1 **Epidemiological characteristics of three SARS-CoV-2 variants of concern and implications for**  
2 **future COVID-19 pandemic outcomes**

3 Wan Yang<sup>1</sup> and Jeffrey Shaman<sup>2</sup>

4 <sup>1</sup>Department of Epidemiology, <sup>2</sup>Department of Environmental Health Sciences, Mailman School  
5 of Public Health, Columbia University, New York, NY, USA

6 Correspondence to: wy2202@cumc.columbia.edu (WY); jls106@cumc.columbia.edu (JS)

7  
8 **Abstract**

9 Three SARS-CoV-2 variants classified as variants of concern – B.1.1.7, B.1.351, and P.1 – have  
10 spread globally. To characterize their viral and epidemiological properties in support of public  
11 health planning, we develop and apply a model-inference system to estimate the changes in  
12 transmissibility and immune escape for each variant, based on case and mortality data from the  
13 country where each variant emerged. Accounting for under-detection of infection, disease  
14 seasonality, concurrent non-pharmaceutical interventions, and mass-vaccination, we estimate  
15 that B.1.1.7 has a 46.6% (95% CI: 32.3 – 54.6%) increase in transmissibility but nominal immune  
16 escape from protection induced by prior wild-type infection; B.1.351 has a 32.4% (95% CI: 14.6  
17 – 48.0%) increase in transmissibility and 61.3% (95% CI: 42.6 – 85.8%) immune escape; and P.1  
18 has a 43.3% (95% CI: 30.3 – 65.3%) increase in transmissibility and 52.5% (95% CI: 0 – 75.8%)  
19 immune escape. Model simulations indicate that B.1.351 and P.1 could supplant B.1.1.7  
20 dominance and lead to increased infections. Our findings highlight the importance of  
21 preventing the spread of B.1.351 and P.1, in addition to B.1.1.7, via continued preventive  
22 measures, prompt mass-vaccination of all populations, continued monitoring of vaccine  
23 efficacy, and possible updating of vaccine formulations to ensure high efficacy.

24  
25 **Main text**

26 Multiple SARS-CoV-2 variants have been identified since summer 2020. Among these, three  
27 variants – namely, B.1.1.7, B.1.351, and P.1 – have been classified as variants of concern (VOCs),  
28 per evidence indicating these genotypes are substantially more transmissible, evade prior  
29 immunity (either vaccine-induced or conferred by natural infection with wild-type virus),  
30 increase disease severity, reduce the effectiveness of treatments or vaccines, or cause  
31 diagnostic detection failures.<sup>1,2</sup> Multiple lines of evidence indicate the B.1.1.7 variant is roughly  
32 50% more transmissible than wild-type virus but does not produce antigenic escape.<sup>3-6</sup> Further,  
33 several studies have shown that both the B.1.351 and P.1 variants are resistant to  
34 neutralization by convalescent plasma from individuals previously infected by wild-type SARS-  
35 CoV-2 viruses and sera from vaccinated individuals;<sup>5-9</sup> however, changes to the transmissibility  
36 of these latter two variants are less well resolved. A better understanding of the  
37 transmissibility and immune escape properties of VOCs – in particular, B.1.351 and P.1 at

38 present – is needed to anticipate future COVID-19 pandemic outcomes and support public  
39 health planning.

40

41 In this study, we develop a model-inference system to estimate the relative change in  
42 transmissibility and level of immune evasion for different SARS-CoV-2 variants, while  
43 accounting for under-detection of infection, delays of reporting, disease seasonality, non-  
44 pharmaceutical interventions (NPIs), and vaccination. Testing using model-generated synthetic  
45 incidence and mortality data indicates this inference system is able to accurately identify shifts  
46 in transmissibility and immune evasion. We then apply the validated inference system in  
47 conjunction with incidence and mortality data from the UK, South Africa, and Brazil – the three  
48 countries where VOCs B.1.1.7, B.1.351, and P.1 were first identified, respectively – to estimate  
49 the change of transmissibility and immune evasion for the three VOCs, separately. We further  
50 use these inferred findings in a multi-variant, age-structured model to simulate epidemic  
51 outcomes in a municipality like New York City (NYC) where multiple variants, including B.1.1.7,  
52 B.1.351, and P.1, have been detected.

53

#### 54 **The model-inference system and validation**

55 We first tested our model-inference system using 10 model-generated synthetic datasets,  
56 depicting different combinations of population susceptibility prior to the emergence of a new  
57 variant, changes in transmissibility and immune evasion for the new variant, and infection-  
58 detection rate. As population susceptibility, interventions, and disease seasonality can all affect  
59 apparent transmissibility at a given time and in order to focus on variant-specific properties,  
60 here we defined transmissibility as the average number of secondary infections per primary  
61 infection, *after removing the effects of these three factors* (see Methods). We then quantified  
62 the change in transmissibility as its relative increase once the new variant becomes dominant.  
63 Similarly, we quantify the level of immune evasion as the increase in susceptibility after the  
64 new variant becomes dominant, relative to prior population immunity from wild-type infection.

65

66 Fig. 1 shows example test results comparing model-inference system estimates with model-  
67 generated ‘true’ values of transmissibility and susceptibility using an infection-detection rate of  
68 20%. Across a range of epidemic dynamics, the model-inference system is able to fit both  
69 weekly incidence and mortality data (Fig. 1A) and estimate the transmissibility and  
70 susceptibility over time for both the initial pandemic wave and the subsequent pandemic wave  
71 caused by a new variant (Fig. 1B). In addition, when aggregated over both pandemic waves, the  
72 model-inference system is able to estimate the relative changes in transmissibility and immune  
73 evasion due to a new variant (Fig. 1C). When the system is less well constrained (e.g., an  
74 infection-detection rate of 10%), model estimates, albeit less accurate, still closely track true  
75 values in most instances (Fig S1).

76

## 77 **Reconstructed pandemic dynamics in the three countries**

78 Following the initial emergence of SARS-CoV-2 in early 2020, the UK, South Africa, and Brazil  
79 experienced very different epidemics (Fig. 2). The model-inference system is able to recreate  
80 the observed incidence and mortality epidemic curves for all three countries (Fig 2 A, C, and E).  
81 Further, cross-validation using independent data shows that the model estimates closely match  
82 measured SARS-CoV-2 prevalence in the UK<sup>10,11</sup> and serology measures of cumulative infection  
83 rates in South Africa<sup>12,13</sup> and Brazil,<sup>14</sup> respectively (Fig 2 B, D, and F). These results indicate the  
84 model-inference system accurately estimates the underlying transmission dynamics for all  
85 three countries.

86

87 In the UK, a prompt lockdown allowed the country to contain the first pandemic wave (Fig. 3).  
88 The real-time effective reproduction number ( $R_t$ ), which measures the average number of  
89 secondary infections at a given point in time, dropped from 2.2 (95% CrI: 1.0 – 3.9) during the  
90 week of 3/1/2020 to below 1 during the week of 3/22/2020, the first week of the lockdown (Fig  
91 3A). By the week of 6/28/2020 (the week with the lowest incidence following the first  
92 pandemic wave), 6.4% (95% CrI: 3.6 – 12.3%) of the UK population are estimated to have been  
93 infected. However, with the relaxation of intervention measures during the summer,  
94 transmission gradually increased again (as indicated by the estimated  $R_t > 1$ ), leading to a large  
95 surge of infections in the autumn of 2020 (Figs 2A-B and 3A). A second lockdown implemented  
96 in Nov 2020 reduced transmission transiently ( $R_t$  was below 1 during the 4-week lockdown  
97 period; Fig 3A). Shortly thereafter widespread transmission of the B.1.1.7 variant led to a  
98 further increase of cases before this activity was curtailed by a third lockdown and mass-  
99 vaccination.

100

101 In South Africa, initial transmission was low likely due to a strong public health response (a  
102 lockdown was implemented from 3/26/20 to 4/16/20) and less conducive conditions for  
103 transmission during southern hemisphere summer and autumn (Figs 2C, 3D, and S2B).  
104 However, as the country relaxed intervention measures and entered the winter, transmission  
105 increased substantially from May 2020 onwards, leading to a large pandemic wave during May  
106 – Sep 2020. After accounting for under-detection of infection (Fig S3C), consistent with serology  
107 data,<sup>12,13</sup> the model-inference system estimates that 30.0% (95% CrI: 18.0 – 47.1%) of the  
108 population had been infected by the week of 9/20/2020 (i.e., the week with the lowest  
109 incidence following the first pandemic wave; Fig 2D). After two months with relatively low  
110 incidence, the emergence of the B.1.351 variant led to a resurgence of infections in late 2020  
111 and a larger second pandemic wave (Fig 3D). By the week of 4/11/21, another 38.6% (95% CrI:  
112 24.1 – 61.1%) of the population are estimated to have been infected, including re-infections.

113

114 In Brazil, no national lockdown was implemented during the pandemic. A large first pandemic  
115 wave occurred during Mar – Oct 2020 (Figs 2E and 3G). By the week of 11/1/2020 (i.e., the  
116 week with the lowest incidence following the first wave), 45.7% (95% CrI: 28.4 – 69.0%) of the  
117 population are estimated to have been infected (Fig 3F). This estimate includes all infections  
118 and thus is much higher than the reported number of cases (3.77% of the population; see  
119 estimated infection-detection rates in Fig S3E). In addition, unlike the UK and South Africa  
120 where the pandemic wave rose and fell quickly, pandemic activity – based on national  
121 incidence and mortality curves – remained at high levels for a much longer duration (Fig. 2E).  
122 This may be due to the larger geographical area of Brazil, the aggregative nature of country-  
123 level incidence and mortality data combining multiple outbreak waves from different sub-  
124 regions of the country, and the lack of national restrictions to curb the pandemic. Despite this  
125 large first pandemic wave, the emergence of the P.1 variant led to a second large pandemic  
126 wave from Dec 2020 onwards. Similar traveling waves through the country were evident from  
127 the incidence curve (Fig 2E). By the week of 4/11/21, an additional 60.7% (95% CrI: 40.5 –  
128 92.0%) of the population are estimated to have been infected, including re-infections.

129

### 130 **Estimated increased transmissibility and immune evasion**

131 Accounting for concurrent NPIs, vaccination and seasonal transmission trends (Fig S2), model-  
132 inference system estimates also enable assessment of key properties specific to the three  
133 variants. Estimated transmissibility increased in conjunction with the widespread presence of  
134 the new variant in each country (Fig 3B for B.1.1.7, 3E for B.1.351, and 3H for P.1). Overall,  
135 estimated viral transmissibility increased by 46.6% (95% CI: 32.3 – 54.5%) for the B.1.1.7  
136 variant, 32.4% (95% CI: 14.6 – 48.0%) for the B.1.351 variant, and 43.3% (95% CI: 30.3 – 65.3%)  
137 for the P.1 variant, compared to the wild-type virus (Table 1). In addition, the model-inference  
138 system also detects large increases of population susceptibility for the B.1.351 and P.1 variants,  
139 but not the B.1.1.7 variant (Fig. 3F and 3I vs. 3C; and Table 1). Specifically, the model estimates  
140 immune evasion for the B.1.351 variant among 61.3% (95% CI: 42.6 – 85.8%) of the population  
141 infected with the wild-type virus during the first wave in South Africa and for the P.1 variant  
142 among 52.5% (95% CI: 0 – 75.8%) of the population infected with the wild-type virus during the  
143 first wave in Brazil.

144

### 145 **Competition among variants and potential future outcomes.**

146 As many places have now detected one or more of the three VOCs locally, it is important to  
147 understand the potential pandemic outcomes given the characteristics of and competition  
148 among variants, interactions with ongoing NPIs, and mass-vaccination. We thus use a multi-  
149 variant, age-structured model to simulate potential pandemic outcomes for the period from  
150 May 2021 to Aug 2021 under scenarios with different variant prevalence, NPIs, and vaccine

151 efficacy. We focus on NYC for which detailed data and estimates (e.g., contact patterns, variant  
152 prevalence, and vaccination rates) are available.

153

154 Fig 4A and Fig S4 show example projections of infections and mortality assuming a best-case  
155 scenario in which vaccine-induced immunity is as effective against all three VOCs as for the  
156 wild-type virus. At the time of these simulations (i.e., end of April 2021), the B.1.1.7 variant  
157 was the predominant VOC in NYC; however, given their estimated propensity for immune  
158 escape, both B.1.351 and P.1 could outcompete B.1.1.7 and become predominant in the  
159 coming months (Fig 4A, top panel). The relative prevalence of B.1.351 and P.1 depends largely  
160 on their initial introduction and establishment in the population. These two variants would  
161 arise at similar rates and co-dominate, if they are introduced and established in the population  
162 simultaneously (Fig 4A, left panel). However, should either be established in the population  
163 ahead of the other, it would become dominant and suppress but not preclude the rise of the  
164 other variant (Fig 4A, middle and right panels). In addition, the B.1.351 variant would be slightly  
165 more competitive if the vaccines are less effective against it than the P.1. variant (Fig 4B and  
166 Table S1), as has been shown in laboratory studies<sup>7,9</sup>.

167

168 Tallies of model-projected infections (Fig 4B) and deaths (Fig S4) reveal four key determinants  
169 of future pandemic outcomes. First, simultaneous introduction of both the B.1.351 and P.1  
170 variants would lead to larger increases of infections and mortality than sole introduction of  
171 either variant (Fig 4B and Fig S4B). This result indicates the importance of limiting the  
172 introduction of multiple VOCs. Second, maintaining very high vaccine efficacies against all  
173 variants is critical for mitigating the risk of a large resurgence in populations with relatively high  
174 vaccination coverage (e.g., compare the first three subplots in Fig 4B). Third, continued non-  
175 pharmaceutical preventive measures will reduce infection resurgence as municipalities reopen  
176 economies. For instance, even with high vaccine efficacy, a rapid, full reopening before a very  
177 large proportion of the population are fully vaccinated could lead to approximately three times  
178 as many infections as when reopening occurs more slowly (Fig 4A and Fig 4B first subplot). Four,  
179 reassuringly, while projected trends for COVID-19-related mortality are in general similar to  
180 those for infection (Fig S4A vs. Fig 4A), lower proportions of COVID-19-related deaths would  
181 occur due to the increased transmission of B.1.351 and/or P.1 (Fig S4B vs. Fig 4B; note the  
182 larger proportion of deaths due to B.1.1.7 than infections). This is due to the currently higher  
183 vaccination coverage among older adults who have been prioritized for vaccination in NYC  
184 similar to many other municipalities (see Table S4 for vaccination coverage by age group). This  
185 finding emphasizes the importance of vaccine effectiveness against VOCs and of prioritizing  
186 vulnerable populations for vaccination in order to prevent severe outcomes of COVID-19.

187

188 **DISCUSSION**

189 Despite vaccine availability, the future trajectory of the COVID-19 pandemic remains uncertain  
190 due to the potential additional emergence and continued spread of multiple VOCs. To improve  
191 understanding of future pandemic dynamics, here we have developed and applied a  
192 comprehensive model-inference system to quantify key viral properties for three VOCs: B.1.1.7,  
193 B.1.351, and P.1. Our estimates for the B.1.1.7 variant are consistent with detailed  
194 epidemiological evidence (32.5 – 54.6% increase in transmissibility and minimal immune  
195 evasion estimated here vs. 30 – 50% increase in secondary attack rate based on contact tracing  
196 data<sup>3,4</sup> and little immune evasion based on laboratory and real-world vaccination data<sup>5,6,15</sup>). Our  
197 estimates of the level of immune evasion for the B.1.351 and P.1 variants are also consistent  
198 with antibody neutralization data suggesting both variants can evade prior immunity induced  
199 by infection and vaccination, though to a larger extent for the B.1.351 variant.<sup>7,9</sup> Here we  
200 provide joint quantification of immune escape and the change in transmissibility for both  
201 variants. Overall, the model-inference system estimates and model simulations suggest that  
202 both B.1.351 and P.1 are likely more competitive than the B.1.1.7 variant due to their greater  
203 propensity for immune escape. These estimates are consistent with observations from Qatar<sup>15</sup>  
204 and Canada<sup>16</sup> showing that the proportion of infections caused by B.1.351 and/or P.1 increased  
205 despite earlier introduction and dominance of B.1.1.7 in these populations. Therefore, in spite  
206 of the current widespread prevalence of B.1.1.7 in Europe and North America, importation of  
207 B.1.351 and/or P.1 to these regions could replace B.1.1.7 dominance and lead to a further  
208 increase of infections by either B.1.351, P.1 or both variants. Mass-vaccination with highly  
209 effective vaccines is thus crucial for mitigating the risk of future SARS-CoV-2 resurgence,  
210 particularly as economies re-open.

211  
212 Our model-inference system estimates substantial immune escape for both P.1 and B.1.351.  
213 For P.1, the mean estimate is bounded by a very broad confidence interval; however, for  
214 B.1.351 the uncertainty is more constrained and indicates greater confidence that a substantial  
215 level of immune escape occurs. These latter findings are supported by vaccine clinical trial and  
216 real-world data. In particular, Shinde et al.<sup>13</sup> found a similar likelihood of COVID-19, mostly due  
217 to B.1.351, among trial participants who were seropositive at enrollment (i.e., after the first  
218 wave) compared to those seronegative. Although potential differences in risk of exposure  
219 among the two comparison groups may have somewhat biased this finding, substantial repeat  
220 and breakthrough infection occurred due to B.1.351. Further, recent data from Qatar<sup>15</sup> indicate  
221 that individuals receiving the full dosing regimen of the Pfizer BNT162b2 mRNA vaccine are at  
222 greater risk of breakthrough infection with the B.1.351 variant than B.1.1.7. Continued  
223 monitoring of the severity of both repeat and breakthrough infections is needed to more fully  
224 understand ongoing risks of VOCs to both health and economy. In addition, the Qatar study<sup>15</sup>  
225 highlights the importance of full vaccination (i.e., administration of both doses for mRNA  
226 vaccines), as participants gained little protection against severe illness after the first vaccine



227 dose (vs. ~50% efficacy for B.1.1.7), even though full protection against severe illness was  
228 retained after two vaccine doses. It is thus likely critical that best vaccination protocols are  
229 followed in order to confer protection against variants with immune escape properties and that  
230 potential waning of vaccine-induced immunity over time is monitored.

231  
232 In light of the spatial expansion of B.1.1.7, B.1.351, and P.1 and the potential emergence of  
233 other new variants, vaccination is paramount for controlling the COVID-19 pandemic. It is  
234 imperative that vaccine production, distribution, and administration proceed expeditiously,  
235 particularly in resource-limited settings. Without effective global control of the pandemic,  
236 continued transmission of SARS-CoV-2 will give rise to additional new variants and pose new  
237 threats to all. As vaccines are distributed and administered, a continuation of non-  
238 pharmaceutical preventive measures is needed to minimize infections among the unvaccinated.  
239 As shown in our simulations, despite the relatively high vaccine coverage obtained to date in a  
240 place like NYC, COVID-19 infections could resurge if such locations lift preventive measures  
241 prematurely.

242  
243 Due to a lack of sub-regional data, we used aggregated country-level data to estimate the  
244 properties for the three VOCs. Our model-inference system also did not account for differences  
245 of disease severity and infection-detection rate among age groups, which may vary  
246 substantially.<sup>17</sup> This model simplification may introduce uncertainty and bias to our estimates,  
247 particularly for Brazil where country-level data may mask more intense transmission in  
248 subpopulations and may have led to underestimation of the transmissibility of P.1.  
249 Nevertheless, validation using independent data, including for Brazil, indicates that the model-  
250 inference system is able to closely capture pandemic dynamics and accurately estimate  
251 cumulative infection rates (Fig 2). Further, because the model-inference system simultaneously  
252 accounts for population susceptibility, disease seasonality, NPIs, and vaccination, it is able to  
253 specifically estimate changes related to a given new variant and closely matches available  
254 epidemiological data (e.g., for B.1.1.7). The model simulations using these estimated  
255 characteristics further illustrate the relative competitiveness of the three VOCs and delineate  
256 key determinants of future infection outcomes. Overall, our findings point to the importance of  
257 preventing the spread of the B.1.351 and P.1 variants, in addition to B.1.1.7, via continued NPIs,  
258 prompt mass-vaccination of all populations, continued monitoring of vaccine efficacy, and  
259 potentially updating vaccine formulations to ensure high efficacy.

260

## 261 **METHODS**

### 262 **Data sources and processing**

263 The model-inference system uses reported COVID-19 case and mortality data to capture  
264 transmission dynamics, weather data to estimate disease seasonality, mobility data to

265 represent concurrent NPIs, and vaccination data to account for changes in population  
266 susceptibility due to vaccination, for each of the three countries (i.e., the UK, South Africa, and  
267 Brazil). Country-level daily COVID-19 case and mortality data came from COVID-19 Data  
268 Repository of the Center for Systems Science and Engineering (CSSE) at Johns Hopkins  
269 University;<sup>18,19</sup> we aggregated the data to weekly intervals until the week of 4/11/2021 but  
270 excluded initial weeks with low case rates (<2 per million population). Hourly surface station  
271 temperature and relative humidity came from the Integrated Surface Dataset (ISD) maintained  
272 by the National Oceanic and Atmospheric Administration (NOAA) and are accessible using the  
273 “stationaRy” R package.<sup>20,21</sup> We computed specific humidity using temperature and relative  
274 humidity per the Clausius-Clapeyron equation.<sup>22</sup> We then aggregated these data for all  
275 weather stations in each country with measurements since 2000 and calculated the average for  
276 each week of the year during 2000-2020. To compute the seasonal trend, we used a method  
277 developed by Yuan et al.<sup>23,24</sup> which estimates the relative reproduction number based on  
278 temperature and specific humidity (see details in Supplemental Information). Daily mobility  
279 data were derived from Google Community Mobility Reports;<sup>25</sup> we aggregated all business-  
280 related categories (i.e., retail and recreational, transit stations, and workplaces) in all locations  
281 in each country to weekly intervals. Daily vaccination data (for 1<sup>st</sup> and 2<sup>nd</sup> dose if applied) for  
282 the UK were sourced from Public Health England;<sup>26</sup> and data for South Africa and Brazil were  
283 obtained from Our World in Data.<sup>27,28</sup>

284

### 285 **Model-inference system**

286 Contact tracing data capturing chains of transmission can be used to compute the secondary  
287 attack rate and quantify changes in transmissibility due to a given new variant. Surveillance  
288 data and laboratory viral characterization can be used to document and quantify levels of  
289 immune evasion. Yet such detailed data are often not available, particularly for resource-  
290 limited settings. Given these circumstances, mathematical modeling that assimilates epidemic  
291 surveillance data provides an attractive alternate means for estimating key epidemiological  
292 properties of novel variants, including the transmission rate. However, joint estimation of the  
293 transmission rate and population susceptibility, which is related to immune evasion, is  
294 challenging, as both quantities can change for a new variant. This problem arises  
295 mathematically because the product of these two quantities, rather than either individually,  
296 determines disease incidence – i.e., at any point in time, given the incidence, transmissibility  
297 and susceptibility are not individually identifiable. Nevertheless, we posit that transmissibility  
298 and susceptibility affect epidemic dynamics differentially *over time*, and, as such, data at  
299 multiple time points can enable joint estimation. We thus design a model-inference system to  
300 estimate the most plausible joint changes in these two quantities using commonly available  
301 incidence and mortality time series.

302



303 The model-inference system is comprised of an epidemic model for simulating the transmission  
304 dynamics of SARS-CoV-2 and a statistical inference method for estimating the model state  
305 variables and parameters. The epidemic model is a susceptible-exposed-infectious-recovered-  
306 susceptible (SEIRS) construct that further accounts for two-dose vaccination. In addition, to  
307 include the effects of public health interventions and disease seasonality, it further adjusts the  
308 transmission rate each week using mobility data and the estimated seasonal trend based on  
309 climate conditions (see Eqn S3 in the Supplemental Information). The system then combines  
310 the model-simulated (prior) estimates and observed case and mortality data to compute  
311 posterior estimates using the ensemble Kalman adjustment filter (EAKF).<sup>29</sup> We also apply a  
312 technique termed space re-probing<sup>30</sup> that accommodates possible large changes mid-pandemic  
313 to transmissibility and population susceptibility. Further, due to the challenge identifying these  
314 two quantities individually, we ran the model-inference system, repeatedly and in turn, in order  
315 to test 14 major combinations of changes in transmissibility and susceptibility (see details in  
316 Supplemental Information). Briefly, depending on the hypothesized change, we restricted the  
317 EAKF update to a given related set of parameters or variables. For instance, for the hypothesis  
318 that the new variant changes the transmissibility but does not evade immunity, the system only  
319 allows major adjustment to the transmission rate and the infectious period; for the hypothesis  
320 that the new variant induces both changes, the system allows major adjustment to the  
321 transmission rate, the infectious period, and population susceptibility. The system then selects  
322 the run with the best performance based on the accuracy of model-fit, one-step ahead  
323 prediction, and magnitude of changes to key state variables to identify the most plausible  
324 combination of changes in transmissibility and level of immune evasion (see Supplemental  
325 Information). To approximate the distribution of the system (including all model state variables  
326 and parameters), we employed an ensemble of model replica ( $n = 500$  here) and updated the  
327 ensemble posterior each week using the EAKF. In addition, to account for model stochasticity,  
328 we repeated each model-inference simulation 100 times for each dataset, each with initial  
329 parameters and variables randomly drawn from prior distributions (Table S2). Consequently,  
330 model estimates are aggregated from 50,000 model runs in total.

331

### 332 **Estimation of variant-specific changes in transmissibility and level of immune evasion**

333 The model decouples the impact of concurrent NPIs and disease seasonality from the  
334 transmission rate and infectious period (Eqn S3); as such, estimates for the latter two  
335 parameters are variant-specific. We thus compute transmissibility as the product of the  
336 transmission rate and infectious period. To reduce uncertainty, we average transmissibility  
337 estimates over the first pandemic wave (excluding the first three weeks when model estimates  
338 are less accurate) for the wild-type SARS-CoV-2 virus; similarly, we average the transmissibility  
339 estimates over the period when the new variant is dominant. We identify this latter time period  
340 based on the transmissibility estimates: 1) For the UK (B.1.1.7) and South Africa (B.1.351), the

341 estimated transmissibility increased and plateaued within 10 weeks (see Fig 3); we thus used  
342 the period from the week with the maximal transmissibility during the 10 weeks following its  
343 initial increase to the end of our study period (i.e., the week of 4/11/2021). However, for the  
344 UK, we excluded the 3<sup>rd</sup> lockdown period when estimated transmissibility is lower, potentially  
345 due to better awareness of B.1.1.7 and preventive measures taken at the time not fully  
346 captured by the model. Of note, contact tracing data also indicate a lower increase of the  
347 secondary attack rate around that time: 25-40% during 11/30/20 – 1/10/21 (among 1,364,301  
348 cases for this expanded analysis)<sup>4</sup> vs. 30-50% during 11/30 – 12/20/20 (among 386,805 cases).<sup>3</sup>  
349 2) For Brazil (P.1), the estimated transmissibility increased more gradually (see Fig 3), we thus  
350 instead used either the weeks identified per 1) or the last 8 weeks of our study period,  
351 whichever with a longer time period, to ensure the robustness of estimation. We then  
352 compute the average change in transmissibility due to a new variant as the ratio of the two  
353 averaged estimates (i.e., after: before the rise of the new variant).

354  
355 To quantify immune evasion, we record all time points inducing major EAKF adjustments to  
356 posterior estimates of susceptibility, compute the change in immunity as  $\Delta Imm = S_{t+1} - S_t + i_t$   
357 (with  $S_t$  as the susceptibility at time- $t$  and  $i_t$  as the new infections occurring at time- $t$ ), and sum  
358 over all  $\Delta Imm$  estimates to compute the total change in immunity due to the new variant. We  
359 then compute the level of immune evasion as the ratio of the total change in immunity during  
360 the second wave to the model-estimated population immunity at the end of the first wave. This  
361 ratio provides an estimate of the fraction of individuals previously infected who are susceptible  
362 to re-infection with the new variant.

363  
364 For both quantities, we report the mean and 95% CI based on the mean estimates from 100  
365 repeated model-inference runs.

### 366 367 **Model validation using model-generated synthetic data**

368 To test the accuracy of the model-inference system, we generated 10 synthetic datasets using a  
369 two-variant SEIRS model (see Eqn. S4) and different scenarios of changing transmissibility and  
370 immune evasion (Table S3). In each scenario, a new variant was introduced at week 21 of the  
371 simulation. We then combined the incidence and mortality due to both variants and added  
372 noise drawn from a Poisson distribution to represent observational error. We then applied the  
373 model-inference system to estimate the model variables and parameters for each synthetic  
374 dataset, per the procedure described above for real data. For comparison with model-  
375 inference system estimates, we computed the true values of population susceptibility and  
376 transmissibility over time as the weighted average of the two variants based on the relative  
377 prevalence at each time point (i.e., each week).

378

### 379 **Model validation using independent data**

380 To compare model estimates with independent observations not assimilated into the model-  
381 inference system, we identified four relevant datasets: 1) the REACT study, which measures the  
382 prevalence of SARS-CoV-2 using PCR-testing of volunteers from the general public living in the  
383 UK. At the time of this study, the REACT study has conducted 10 rounds of testing during  
384 5/1/2020 – 3/30/2021 (n = 1,572,951 tests in total)<sup>10,11</sup>; Fig 2B plots our estimates of prevalence  
385 of SARS-CoV-2 each week, overlaying all 10 measures from the REACT study for corresponding  
386 time periods; 2) a serosurvey of workers in Cape Town, South Africa, conducted  
387 during 8/17 – 9/4/2020 (n = 405 participants);<sup>12</sup> 3) serology tests among participants enrolled  
388 during 8/17 – 11/25/2020 in the Novavax NVX-CoV2373 vaccine phase 2a-b trial in South Africa  
389 (n=1324).<sup>13</sup> Given this long enrollment period, we used the centered 2-week window (9/29 –  
390 10/13/20) to match with our model estimates. and 4) two nationwide random household  
391 serosurveys conducted in Brazil during 5/14 – 5/21/2020 (n = 25,025 participants) and 6/4 –  
392 6/7/2020 (n = 31,165 participants).<sup>14</sup> To account for the delay in antibody generation, we  
393 shifted the timing of each serosurvey 14 days when comparing to model-inference system  
394 estimates of cumulative infection rates in Fig 2 D and E.

395

### 396 **Model simulations testing the relative competitiveness of VOCs and projecting future** 397 **transmission dynamics.**

398 Here we modified a multi-variant model previously developed for influenza virus<sup>31</sup> to include  
399 age structure and interactions (Eqn. S5). The multi-variant model accounts for: 1) competition  
400 between each pair of SARS-CoV-2 variants (e.g. wild-type and B.1.1.7) via cross-protective  
401 immunity; 2) variant-specific transmissibility and population susceptibility, based on estimates  
402 derived in this study; 3) variant-specific vaccine efficacy under different scenarios (see Table  
403 S5); 4) age-specific differences in vaccination coverage at the start of simulation and  
404 vaccination uptake rates for the simulation period (see Table S4); 5) seasonality; and 6) changes  
405 in NPIs under different scenarios (see Table S5). We used data from NYC for baseline  
406 vaccination coverage<sup>32</sup> and initial prevalence of different variants,<sup>33</sup> as well as key model  
407 estimates (e.g., transmission rates and infection fatality risk by age group; see Table S5)<sup>17,34,35</sup>.  
408 As in previous work,<sup>17,34,35</sup> we included 8 age-groups (i.e. <1, 1-4, 5-14, 15-24, 25-44, 45-64, 65-  
409 74, and 75+ year-olds) in the model to account for age-specific differences. To focus on the  
410 three VOCs, we only included the B.1.1.7, B.1.351, and P.1 variants and attributed all other  
411 variants as “wild-type” virus, even though at the start of the simulations, the B.1.526 variant  
412 made up approximately one third of sequenced infections (N.b., the B.1.526 variant likely  
413 emerged locally in NYC; we estimated a ~20% increase in transmissibility and nominal immune  
414 evasion for this variant; based on these estimates the impact of this variant is expected to be  
415 relatively minor). We did not account for potential differences in infection fatality risk by  
416 variant, as such information is not available; therefore, the simulated mortality under different

417 scenarios only reflect the relative infection rate by age group, for which we apply age-specific  
418 infection-fatality risk (see Table S5). In addition, due to uncertainty vis-à-vis the severity and  
419 infection fatality risk among breakthrough infections (i.e., those who have been vaccinated), we  
420 only show mortality-related simulations for the “Same VE” scenario which assumes no  
421 reduction in VE.

422

423 **Data Availability:** All data used in this study are publicly available as described in the “Data  
424 sources and processing” section.

425

426 **Code availability:** All source code and data necessary for the replication of our results and  
427 figures will be made publicly available.

428

429 **Acknowledgements:** This study was supported by the National Institute of Allergy and  
430 Infectious Diseases (AI145883), the National Science Foundation Rapid Response Research  
431 Program (RAPID; DMS2027369) and a gift from the Morris-Singer Foundation.

432

433 **Author contributions:** WY designed the study (main), conducted the model analyses,  
434 interpreted results, and wrote the first draft. JS designed the study (supporting), interpreted  
435 results, and critically revised the manuscript.

436

437 **Competing interests:** JS and Columbia University disclose partial ownership of SK Analytics. JS  
438 discloses consulting for BNI.

#### 439 **References:**

- 440 1 Centers for Disease Control and Prevention. *SARS-CoV-2 Variant Classifications and*  
441 *Definitions*, <[https://www.cdc.gov/coronavirus/2019-ncov/cases-updates/variant-](https://www.cdc.gov/coronavirus/2019-ncov/cases-updates/variant-surveillance/variant-info.html#Concern)  
442 [surveillance/variant-info.html#Concern](https://www.cdc.gov/coronavirus/2019-ncov/cases-updates/variant-surveillance/variant-info.html#Concern)> (2021).
- 443 2 National Collaborating Centre for Infectious Diseases. *Updates on COVID-19 Variants of*  
444 *Concern*, <<https://nccid.ca/covid-19-variants/>> (2021).
- 445 3 Public Health England. Investigation of novel SARS-CoV-2 variant, Variant of Concern  
446 202012/01, Technical briefing 3. (2020).
- 447 4 Public Health England. Investigation of novel SARS-CoV-2 variant, Variant of Concern  
448 202012/01, Technical briefing 5. (2021).
- 449 5 Wang, P. *et al.* Antibody resistance of SARS-CoV-2 variants B.1.351 and B.1.1.7. *Nature*,  
450 doi:10.1038/s41586-021-03398-2 (2021).
- 451 6 Planas, D. *et al.* Sensitivity of infectious SARS-CoV-2 B.1.1.7 and B.1.351 variants to  
452 neutralizing antibodies. *Nat Med*, doi:10.1038/s41591-021-01318-5 (2021).
- 453 7 Hoffmann, M. *et al.* SARS-CoV-2 variants B.1.351 and P.1 escape from neutralizing  
454 antibodies. *Cell* **184**, 2384-2393 e2312, doi:10.1016/j.cell.2021.03.036 (2021).





- 499 26 Public Health England. *Coronavirus (COVID-19) in the UK*,  
500  [<https://coronavirus.data.gov.uk/details/download>](https://coronavirus.data.gov.uk/details/download) (2020).
- 501 27 *Data on COVID-19 (coronavirus) vaccinations by Our World in Data*,  
502  [<https://github.com/owid/covid-19-data/tree/master/public/data/vaccinations>](https://github.com/owid/covid-19-data/tree/master/public/data/vaccinations) (2020).
- 503 28 Mathieu, E. *et al.* A global database of COVID-19 vaccinations. *Nature Human Behaviour*,  
504 doi:10.1038/s41562-021-01122-8 (2021).
- 505 29 Anderson, J. L. An Ensemble Adjustment Kalman Filter for Data Assimilation. *Mon.*  
506 *Weather Rev.* **129**, 2884-2903, doi:10.1175/1520-0493(2001)129<2884:aeakff>2.0.co;2  
507 (2001).
- 508 30 Yang, W. & Shaman, J. A simple modification for improving inference of non-linear  
509 dynamical systems. *arXiv*, 1403.6804 (2014).
- 510 31 Yang, W., Lau, E. H. Y. & Cowling, B. J. Dynamic interactions of influenza viruses in Hong  
511 Kong during 1998-2018. *PLOS Computational Biology* **16**, e1007989,  
512 doi:10.1371/journal.pcbi.1007989 (2020).
- 513 32 New York City Department of Health and Mental Hygiene. *COVID-19: Data - COVID-19*  
514 *Vaccines*,  [<https://www1.nyc.gov/site/doh/covid/covid-19-data-vaccines.page>](https://www1.nyc.gov/site/doh/covid/covid-19-data-vaccines.page) (2021).
- 515 33 New York City Department of Health and Mental Hygiene. *COVID-19: Data - COVID-19*  
516 *Virus Variants*,  [<https://www1.nyc.gov/site/doh/covid/covid-19-data-archive.page>](https://www1.nyc.gov/site/doh/covid/covid-19-data-archive.page)  
517 (2021).
- 518 34 Yang, W., Kandula, S. & Shaman, J. *Projections of COVID19 Epidemic Outcomes and*  
519 *Healthcare Demands for New York City (NYC)*,  [<https://github.com/wan-  
520 yang/COLUMBIA-COVID19-PROJECTIONS-FOR-NYC>](https://github.com/wan-yang/COLUMBIA-COVID19-PROJECTIONS-FOR-NYC) (2020).
- 521 35 Yang, W., Shaff, J. & Shaman, J. Effectiveness of non-pharmaceutical interventions to  
522 contain COVID-19: a case study of the 2020 spring pandemic wave in New York City. *J R*  
523 *Soc Interface* **18**, 20200822, doi:10.1098/rsif.2020.0822 (2021).
- 524

### Table and figure captions

**Table 1.** Estimated changes in transmissibility and level of immune evasion. Numbers show model estimated mean (95% CI) from 100 model-inference runs.

**Fig 1.** Model-inference system validation using model-generated synthetic data with an infection-detection rate of 20%. (A) 5 sets of synthetic data (dots) and model-fits to each dataset; lines show mean estimates and surrounding areas show 50% (dark) and 95% (light) CrIs. (B) weekly model estimated transmissibility and population susceptibility; lines show mean estimates and surrounding areas show 50% (dark) and 95% (light) CrIs, compared to the true values (dots). (C) overall estimates of the change in transmissibility and immune evasion (boxes and whiskers show model estimated median, interquartile range, and 95% CI from 100 model-inference simulations) compared to the true values (dots).

**Fig 2.** Model-inference system fit to data for the three countries and validation using independent datasets. The left column shows the model fit to reported weekly case and mortality data for the UK (A), South Africa (C), and Brazil (D). Dots show the weekly number of



cases (in blue) and deaths (in red) per 1 million persons; boxes and whiskers show corresponding model estimates (mean, 50% and 95% Crls). Grey shaded boxes indicate the timing of lockdowns or key periods of restricted activity; horizontal arrows indicate the timing of variant identification and vaccination rollout. The right column compares available, independent measurements to corresponding model estimates. Red dots and error bars show measured prevalence over 10 periods of time from the REACT study for the UK (B), cumulative infection rates from two serology studies in South Africa (D), and cumulative infection rates from two nationwide household serosurveys in Brazil (F). Blue lines and surrounding areas show model estimated mean, 50% (dark) and 95% (light) Crls.

**Fig 3.** Key model-inference system estimates. Left column shows estimated real-time reproduction number  $R_t$ , middle column shows estimated transmissibility, and right column shows estimated population susceptibility for each week during the study period, for the three countries. For comparison, estimated weekly infection rates are superimposed in each plot (right y-axis). Blue lines and surrounding areas show the estimated mean, 50% (dark) and 95% (light) Crls. Boxes and whiskers show the estimated weekly infection rates (mean, 50% and 95% Crls). Grey shaded areas indicate the timing of lockdowns or key periods of restricted activity; horizontal arrows indicate the timing of variant identification and vaccination rollout. *Note that the transmissibility estimates (middle column) have removed the effects of changing population susceptibility, NPIs, and disease seasonality; thus, the trends are more stable than the reproduction number ( $R_t$ ; left column) and reflect changes in variant-specific properties.*

**Fig 4.** Model projections of infection, under different scenarios of VOC co-circulation, NPIs, and vaccine efficacy (VE). (A) Example projected epidemic trajectories for each variant assuming the VE is as high as for the wild-type virus. Lines and surrounding areas show model projected median and interquartile range (color-coded for each variant as indicated by the legend). (B) Tallies over the entire simulation period (May – Aug 2021) for different scenarios of seeding, VE (as indicated in the subtitles), and NPIs (as indicated by the x-axis labels). All numbers are scaled for 1 million people. For the projected percentages for each variant and uncertainty bounds, see Table S1.

Table

**Table 1.** Estimated changes in transmissibility and level of immune evasion. Numbers show model estimated mean (95% CI) from 100 model-inference runs.

| Location       | Variant | Changes in           |                    |
|----------------|---------|----------------------|--------------------|
|                |         | Transmissibility (%) | Immune evasion (%) |
| United Kingdom | B.1.1.7 | 46.6 (32.3, 54.6)    | 3.9 (0, 36.2)      |
| South Africa   | B.1.351 | 32.4 (14.6, 48)      | 61.3 (42.6, 85.8)  |
| Brazil         | P.1     | 43.3 (30.3, 65.3)    | 52.5 (0, 75.8)     |

**Fig 1.** Model-inference system validation using model-generated synthetic data with an infection-detection rate of 20%. (A) 5 sets of synthetic data (dots) and model-fits to each dataset; lines show mean estimates and surrounding areas show 50% (dark) and 95% (light) CrIs. (B) weekly model estimated transmissibility and population susceptibility; lines show mean estimates and surrounding areas show 50% (dark) and 95% (light) CrIs, compared to the true values (dots). (C) overall estimates of the change in transmissibility and immune evasion (boxes and whiskers show model estimated median, interquartile range, and 95% CI from 100 model-inference simulations) compared to the true values (dots).

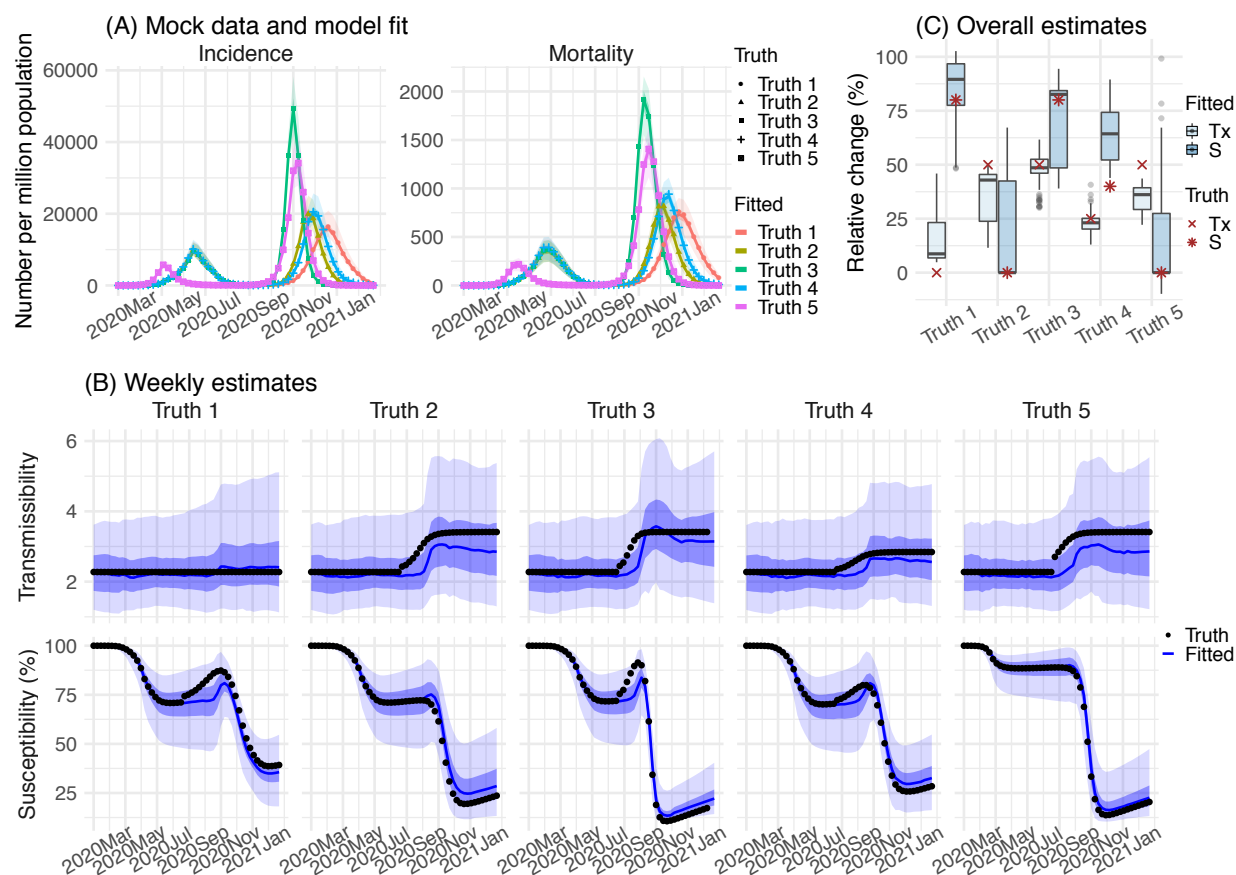

**Fig 2.** Model-inference system fit to data for the three countries and validation using independent datasets. The left column shows the model fit to reported weekly case and mortality data for the UK (A), South Africa (C), and Brazil (E). Dots show the weekly number of cases (in blue) and deaths (in red) per 1 million persons; boxes and whiskers show corresponding model estimates (mean, 50% and 95% CrIs). Grey shaded boxes indicate the timing of lockdowns or key periods of restricted activity; horizontal arrows indicate the timing of variant identification and vaccination rollout. The right column compares available, independent measurements to corresponding model estimates. Red dots and error bars show measured prevalence over 10 periods of time from the REACT study for the UK (B), cumulative infection rates from two serology studies in South Africa (D), and cumulative infection rates from two nationwide household serosurveys in Brazil (F). Blue lines and surrounding areas show model estimated mean, 50% (dark) and 95% (light) CrIs.

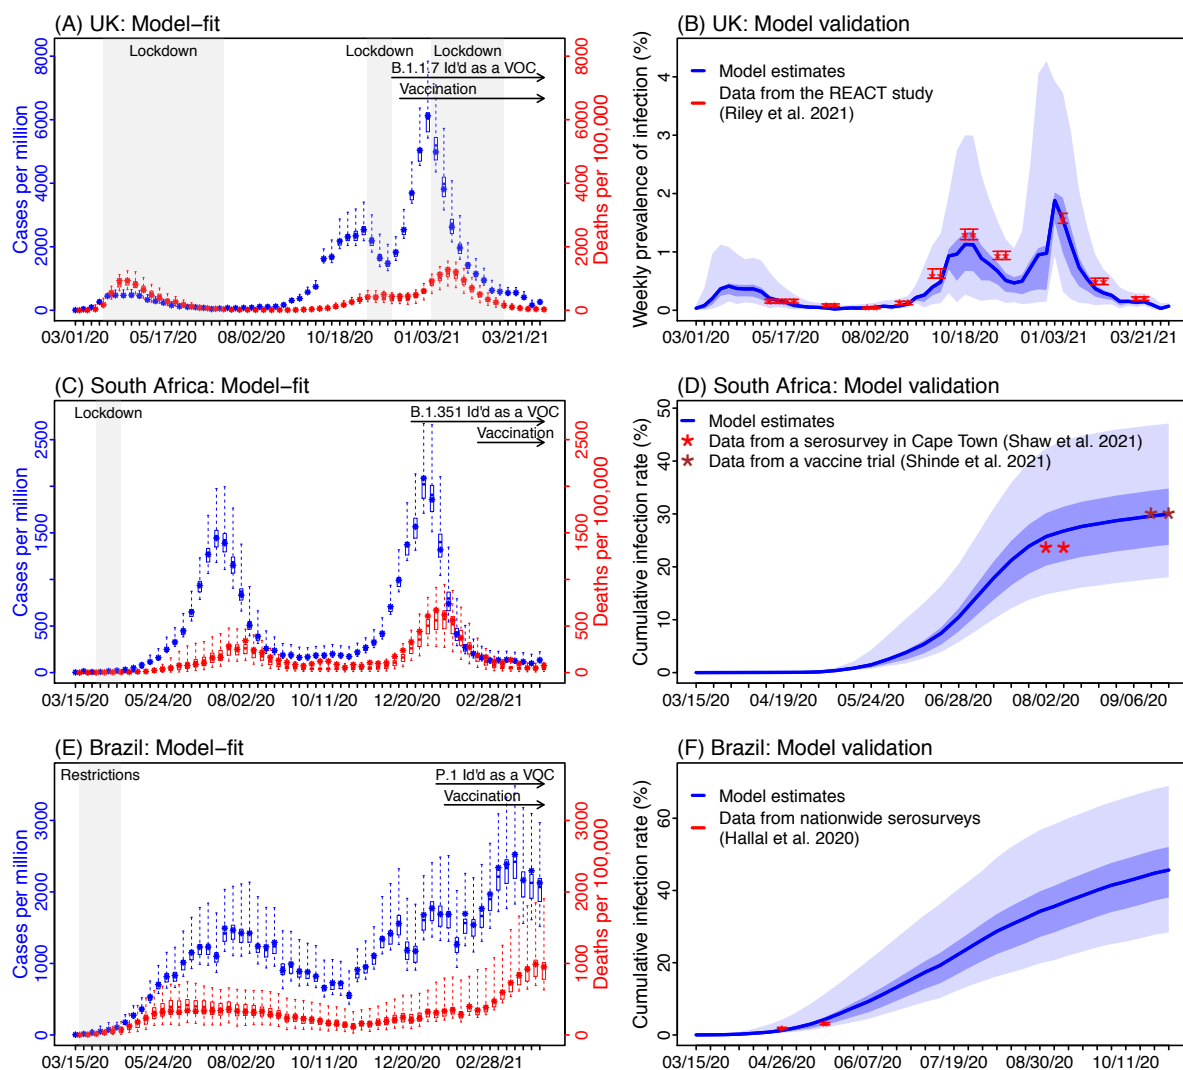

**Fig 3.** Key model-inference system estimates. Left column shows estimated real-time reproduction number  $R_t$ , middle column shows estimated transmissibility, and right column shows estimated population susceptibility for each week during the study period, for the three countries. For comparison, estimated weekly infection rates are superimposed in each plot (right y-axis). Blue lines and surrounding areas show the estimated mean, 50% (dark) and 95% (light) CrIs. Boxes and whiskers show the estimated weekly infection rates (mean, 50% and 95% CrIs). Grey shaded areas indicate the timing of lockdowns or key periods of restricted activity; horizontal arrows indicate the timing of variant identification and vaccination rollout. *Note that the transmissibility estimates (middle column) have removed the effects of changing population susceptibility, NPIs, and disease seasonality; thus, the trends are more stable than the reproduction number ( $R_t$ ; left column) and reflect changes in variant-specific properties.*

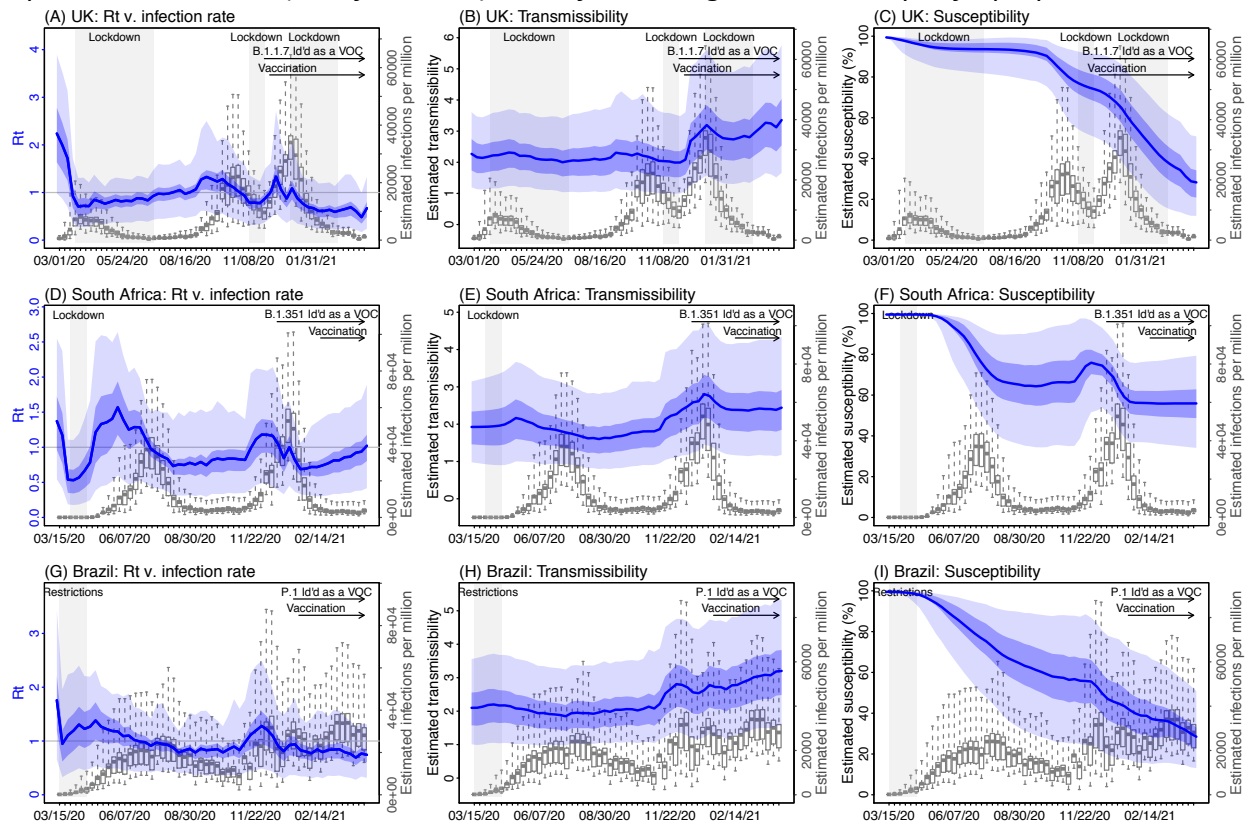

**Fig 4.** Model projections of infection, under different scenarios of VOC co-circulation, NPIs, and vaccine efficacy (VE). (A) Example projected epidemic trajectories for each variant assuming the VE is as high as for the wild-type virus. Lines and surrounding areas show model projected median and interquartile range (color-coded for each variant as indicated by the legend). (B) Tallies over the entire simulation period (May – Aug 2021) for different scenarios of seeding, VE (as indicated in the subtitles), and NPIs (as indicated by the x-axis labels). All numbers are scaled for 1 million people. For the projected percentages for each variant and uncertainty bounds, see Table S1.

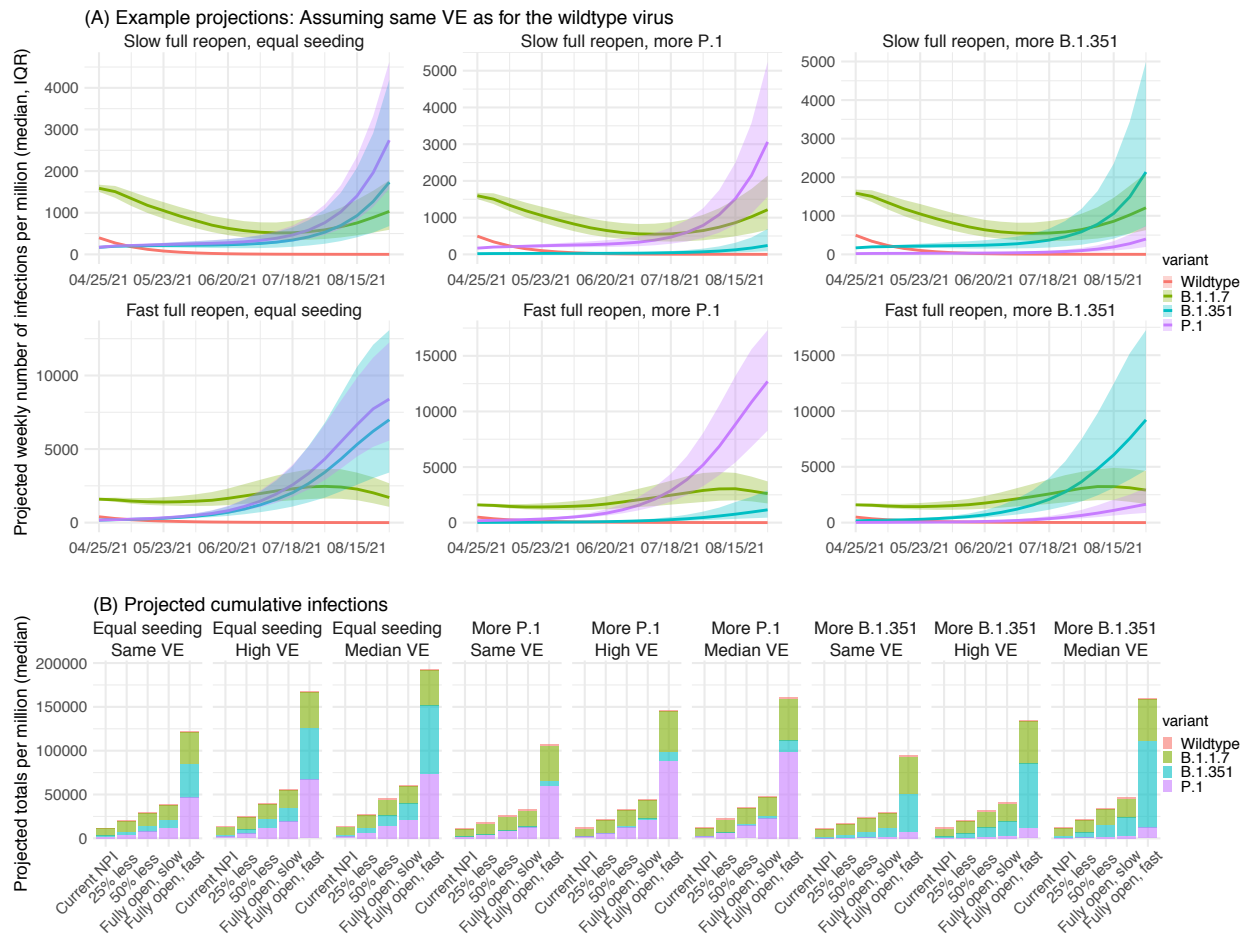



## Supplemental Information

for

### Epidemiological characteristics of three SARS-CoV-2 variants of concern and implications for future COVID-19 pandemic outcomes

Wan Yang and Jeffrey Shaman

#### 1. Estimating seasonal trends

Many respiratory infections tend to occur seasonally and are predominantly prevalent during certain months of the year (e.g., cold months in temperate climates).<sup>1</sup> This seasonal pattern has been documented for influenza viruses,<sup>2</sup> respiratory syncytial viruses,<sup>3</sup> and endemic human coronaviruses.<sup>4</sup> In addition, studies have showed that this seasonality may be associated with climate conditions – particularly, temperature and humidity – as they may modulate the survival and transmission of respiratory viruses.<sup>5-8</sup> For the SARS-CoV-2 virus, our work has also shown that a winter-time seasonality exists, similar to endemic human coronaviruses in New York City (NYC), and that models accounting for this seasonality enable more accurate projection of COVID-19 pandemic dynamics than those do not.<sup>9,10</sup> However, to date, no mechanistic models exist that quantify the response of the SARS-CoV-2 virus to temperature and humidity and in turn the seasonality of COVID-19. In addition, seasonal trends may differ by climate. For instance, epidemics of influenza can occur any time of the year in subtropical and tropical climates; it is thus more difficult to characterize the seasonality of respiratory infections in these climates. To address these challenges, we recently developed a flexible climate-forced model of epidemic dynamics for subtropical and tropical climates; results with this model also describe the response to temperature and humidity conditions common in temperate climates.<sup>11,12</sup> Thus, to account for the potentially diverse seasonal trends of COVID-19 in the UK (temperate climates), South Africa (mostly temperate climates), and Brazil (mostly tropical climates), we applied this climate-forcing to temperature and humidity data for each country and computed the relative seasonal trend for each country.

Specifically, the climate-forcing takes the following form:

$$R_0(t) = [aq^2(t) + bq(t) + c] \left[ \frac{T_c}{T(t)} \right]^{T_{exp}} \quad [S1]$$

where  $R_0(t)$  is the basic reproduction number at time  $t$ ;  $q(t)$  is specific humidity (i.e. a measure of absolute humidity) at time  $t$ ; and  $T(t)$  is temperature at time  $t$ . In essence, the forcing function assumes that specific humidity has a bimodal effect on  $R_0$ , with both low and high humidity conditions favoring transmission; in addition, this effect is moderated by temperature, where low temperatures promote transmission and temperatures above a certain threshold (i.e.,  $T_c$  in Eqn. S1) limit transmission. Further, to link the coefficients  $a$ ,  $b$ , and  $c$  to humidity  $q$

36 and  $R_0$ , Yuan et al.<sup>11,12</sup> reparametrized the forcing function by solving the parabola with a nadir  
37 at  $(q_{mid}, R_{0max} - R_{0diff})$  and maxima at both  $(q_{min}, R_{0max})$  and  $(q_{max}, R_{0max})$ , such that:

38

$$\begin{cases} a = \frac{-b}{q_{max} + q_{min}} \\ b = \frac{R_{0diff}(q_{max} + q_{min})}{(q_{max} - q_{mid})(q_{min} - q_{mid})} \\ c = (R_{0max} - R_{0diff}) - aq_{mid}^2 - bq_{mid} \end{cases} \quad [S2]$$

39

40 Yuan et al.<sup>11,12</sup> estimated the parameters  $R_{0max}$  (i.e., the maximum  $R_0$ ),  $R_{0diff}$  (i.e., the difference  
41 between the maximum and minimum  $R_0$ ),  $q_{min}$ ,  $q_{mid}$ , and  $q_{max}$  (i.e., the minimum, median, and  
42 maximum specific humidity for the response),  $T_c$  (the threshold temperature) and  $T_{exp}$  (the  
43 exponent in Eqn S1) for influenza in Hong Kong, a subtropical city, based on long-term epidemic  
44 data collected therein during 1998 - 2018. Here we use their mean estimates for these  
45 parameters and temperature and humidity data for each country (see main text and Fig S5) to  
46 compute the seasonal trend for each country using Eqns. S1-2. However, as these parameters  
47 were estimated for influenza, the outputs do not represent the actual  $R_0$  for the SARS-CoV-2  
48 virus. Thus, we instead compute the *relative* seasonal trend, by scaling the weekly country  
49 output from Eqn S1 by the country mean output, such that this scaled output provides a  
50 *relative*, seasonality-related transmissibility for each week of the year (see results in Fig S2).  
51 These relative estimates also decouple the seasonality-related and variant-specific  
52 transmissibility (assuming no interaction; see below).

53

## 54 **2. Model-inference system**

55 The model-inference system developed for this study consists of an SEIRSV model to simulate  
56 the transmission dynamics of SARS-CoV-2 and the ensemble Kalman adjustment filter (EAKF)<sup>13</sup>  
57 to estimate the model state variables and parameters, based on case and mortality data. Here  
58 we describe the model and the filtering method in detail.

59

### 60 **2.1. Epidemic model.**

61 The SEIRSV (susceptible-exposed-infectious-recovered-susceptible-vaccination) model uses the  
62 following set of equations to simulate the transition of sub-populations between different  
63 disease stages, while accounting for disease seasonality, concurrent non-pharmaceutical  
64 interventions (NPIs), and vaccination:

65

$$\begin{cases} \frac{dS}{dt} = \frac{R}{L} - \frac{b_t e_t m_t \beta_t IS}{N} - \varepsilon - v_1(t) - v_2(t) \\ \frac{dE}{dt} = \frac{b_t e_t m_t \beta_t IS}{N} - \frac{E}{Z} + \varepsilon \\ \frac{dI}{dt} = \frac{E}{Z} - \frac{I}{D} \\ \frac{dR}{dt} = \frac{I}{D} + v_1(t) + v_2(t) \end{cases} \quad [S3]$$

66  
 67 where  $S$ ,  $E$ ,  $I$ ,  $R$  are the number of susceptible, exposed (but not yet infectious), infectious, and  
 68 recovered/deceased individuals, respectively;  $N$  is the population size. The parameter  $\varepsilon$   
 69 represents travel-related importation of infections (nominally set to 1 per 20 days per 1 million  
 70 population, unless specified otherwise). To account for local seasonality,  $b_t$ , the estimated  
 71 relative seasonal trend for each country (see Section 1 above and Fig S2) is used to adjust the  
 72 relative transmission rate at time  $t$ . To account for concurrent NPIs, the term  $m_t$ , the relative  
 73 population mobility at time  $t$  (in this study, we use data from Google Community Mobility  
 74 Reports;<sup>14</sup> see main text and Fig S2), is used to adjust the transmission rate. In addition, as the  
 75 effectiveness of NPIs is unknown and variable, the model further includes a parameter,  $e_t$ , to  
 76 scale NPI effectiveness at time  $t$ . For virus-specific characterization,  $\beta_t$  is the variant-specific  
 77 transmission rate at time  $t$ ,  $Z$  is the latency period,  $D$  is the infectious period, and  $L$  is the  
 78 immunity period. Note that the parameters  $e_t$ ,  $\beta_t$ ,  $Z$ ,  $D$ , and  $L$  are estimated by the model-  
 79 inference system as described below.

80  
 81 To incorporate changes in population susceptibility due to vaccination, the model accounts for  
 82 two-dose vaccination via  $v_1(t)$  and  $v_2(t)$ . Specifically,  $v_1(t)$  is the number of individuals  
 83 successfully immunized after the first dose of the vaccine and is computed using vaccination  
 84 data and vaccine efficacy for 1<sup>st</sup> dose (see detailed settings in Table S2). Similarly,  $v_2(t)$  is the  
 85 additional number of individuals successfully immunized after the second vaccine dose  
 86 (excluding those successfully immunized after the first dose).

## 87 88 2.2. Observation model.

89 We compute the model-simulated number of cases and deaths for each week using the model-  
 90 simulated infection rate, as done in Yang et al.<sup>10</sup> Specifically, we include 1) a time-lag from  
 91 infectiousness to detection (i.e., an infection being diagnosed as a case) – drawn from a gamma  
 92 distribution with a mean of  $T_m$  and standard deviation (SD) of  $T_{sd}$  days – to account for delays in  
 93 diagnosis and detection; 2) an infection-detection rate ( $r$ ), i.e. the fraction of infections  
 94 (including subclinical or asymptomatic infections) reported as cases, to account for under-  
 95 detection; 3) a time-lag from infectiousness to death, drawn from a gamma distribution with a  
 96 mean of 14 days and a standard deviation of 10 days, empirically based on mortality data; and

97 4) an infection-fatality risk (IFR), i.e., the fraction of infections that die from COVID-19. To  
98 compute the model-simulated number of new cases per week, we multiply the model-  
99 simulated number of new infections per day by the infection-detection rate, and further  
100 distribute these simulated cases in time per the distribution of time-from-infectiousness-to-  
101 detection. We then aggregate the daily lagged, simulated cases to weekly totals for model  
102 inference (see below). Similarly, to compute the model-simulated deaths per week and account  
103 for delays in time to death, we multiply the simulated-infections by the IFR and then distribute  
104 these simulated deaths in time per the distribution of time-from-infectiousness-to-death, and  
105 aggregate these daily numbers to weekly totals. For each week, the infection detection rate ( $r$ ),  
106 the mean ( $T_m$ ) and standard deviation ( $T_{sd}$ ) of time-from-infectiousness-to-detection, and the  
107 IFR are estimated based on weekly case and mortality data, along with other model  
108 parameters.

109

### 110 2.3. Inference using the EAKF

111 At the end of each week, the inference system uses the EAKF to update the state variables and  
112 parameters based on model-generated prior estimates and case and mortality data. Briefly, the  
113 EAKF uses an ensemble of model realizations ( $n=500$  here), each with initial parameters and  
114 variables randomly drawn from a prior range (see Table S2). After model initialization, the  
115 system integrates the model ensemble forward in time for a week (per Eqn S3) *stochastically* to  
116 compute the prior distribution for each model state variable or parameter, as well as the  
117 model-simulated number of cases and deaths for that week as described in Section 2.2. The  
118 system then combines the prior estimates with the observed case and death data for the same  
119 week to compute the posterior per Bayes' theorem.<sup>13</sup> During this filtering process, the system  
120 updates the posterior distribution of all model parameters and variables for each week.<sup>13</sup> As  
121 such, it is able to capture the time-varying changes in transmission dynamics including the  
122 variant-specific transmission rate ( $\beta_t$ ) and infectious period ( $D$ ) – the two parameters that we  
123 use to compute variant-specific transmissibility over time.

124

125 However, unlike previous studies using similar model-inference approaches, here we further  
126 modify the EAKF filtering process to test different potential combinations of changes in  
127 transmissibility and immune escape. To enable this exploration of systemic changes (e.g. due  
128 to the emergence of a new variant), we randomly replace a small fraction of ensemble  
129 members (3-10%) using values randomly drawn from specified ranges. This technique, termed  
130 space reprobing (SR), was developed in order to explore state space without corrupting  
131 performance of the filter.<sup>15</sup> Specifically for this application, we apply SR to a given related set of  
132 parameters/variables and restrict the EAKF update of non-related parameters/variables, for 14  
133 different hypothesized behaviors. These hypothesized changes are as follows:

134

- 135 1) Hypothesis 1 (minor changes in transmissibility, no immune escape): Large updates are  
136 only allowed for the two transmissibility-related parameters  $\beta_t$  and  $D$ ; to explore the  
137 changes, the system applies SR to these two parameters using values drawn from prior  
138 ranges 10-20% higher than the initial priors.
- 139 2) Hypothesis 2 (major changes in transmissibility only, no immune escape): Similar to 1);  
140 but to explore the changes, the system applies SR to  $\beta_t$  and  $D$  using values drawn from  
141 prior ranges 30-40% higher than the initial priors.
- 142 3) Hypothesis 3 (minor immune escape only, no changes to transmissibility): Large updates  
143 are only allowed for  $S$ , the population susceptibility, up to a total loss of 50% of the prior  
144 immunity.
- 145 4) Hypothesis 4 (major immune escape only, no changes to transmissibility): Large updates  
146 are only allowed for  $S$ , the population susceptibility, up to a total loss of 95% of the prior  
147 immunity.
- 148 5) Hypothesis 5 (minor changes in transmissibility + minor immune escape): combining 1)  
149 and 3) above.
- 150 6) Hypothesis 6 (major changes in transmissibility + major immune escape): combining 2)  
151 and 4) above.
- 152 7) Hypothesis 7 (minor changes in transmissibility + major immune escape): combining 1)  
153 and 4) above.
- 154 8) Hypothesis 8 (major changes in transmissibility + minor immune escape): combining 2)  
155 and 3) above.
- 156 9) Hypothesis 9 (changes in both transmissibility and immune escape, no restriction on  
157 magnitude of change): Large updates are allowed for  $\beta_t$  and  $D$  as well as  $S$ . To explore  
158 the changes, initial SR uses values drawn from prior ranges 10-20% higher than the  
159 initial priors, and values up to 30-40% higher than the initial priors if the inference  
160 system detects the prior continues to underestimate the observed cases and deaths  
161 with the 10-20% initial increase in SR values. In addition, SR allows updates of  $S$  up to  
162 95% of the prior immunity.

163  
164 To account for slower changes in overall population immunity (i.e., in the entire country) as the  
165 new variant gradually spreads to different sub-regions across a large geographic space, such as  
166 in Brazil, we also explore the fitting using the following five additional settings:

- 167  
168 10) Hypothesis 10 (immune escape only and changes to overall population immunity occur  
169 slowly over time): Large updates are only allowed for  $S$ , up to a total loss of 95% of the  
170 prior immunity; however, SR is applied to a smaller fraction of ensemble members than  
171 in 1)-9) such that changes in  $S$  occur gradually.

- 172 11) Hypothesis 11 (minor changes in transmissibility + minor immune escape; both occur  
173 slowly over time): Large updates are allowed for  $\beta_t$  and  $D$  as well as  $S$ . Adjustment to  $S$   
174 is allowed as in 10) but up to only 50% of prior immunity. In addition, for  
175 transmissibility, the system applies SR to  $\beta_t$  and  $D$  using values drawn from prior ranges  
176 10-20% higher than the initial priors.
- 177 12) Hypothesis 12 (major changes in transmissibility + minor immune escape; both occur  
178 slowly over time): Similar to 11); however, for  $\beta_t$  and  $D$ , initial SR uses values drawn  
179 from prior ranges 10-20% higher than the initial priors, and values up to 30-40% higher  
180 than the initial priors if the inference system detects the prior continues to  
181 underestimate the observed cases and deaths with the 10-20% initial increase in SR  
182 values.
- 183 13) Hypothesis 13 (minor changes in transmissibility + major immune escape; both occur  
184 slowly over time): Similar to the settings specified in 11) but adjustment to  $S$  is allowed  
185 up to 95% of prior immunity.
- 186 14) Hypothesis 14 (major changes in transmissibility + major immune escape; both occur  
187 slowly over time): Similar to settings specified in 12) but adjustment to  $S$  is allowed up  
188 to 95% of the prior immunity.

189  
190 We carry out the model-inference process for each of the 14 settings described above and for  
191 each country dataset. We then select the most plausible hypothesis for each country based on  
192 the following criteria: 1) model fitting to case and mortality data, as indicated by the relative  
193 root-mean-squared-error (RRMSE) between the *posterior* estimates for the corresponding  
194 variable (i.e. case rate or mortality rate) and data; 2) the accuracy of one-step ahead prediction,  
195 as indicated by the RRMSE between the *prior* estimates for the corresponding variable (i.e. case  
196 rate or mortality rate) and data; 3) the level of adjustment needed for two key variables, i.e.,  
197 infection rate and case rate, as indicated by the RRMSE between the *prior* and *posterior*  
198 estimates for each variable; 4) a penalty on the number of variables needing SR adjustment;  
199 and 5) a penalty on the frequency of SR adjustment. We combine all these metrics by weighting  
200 them heuristically using the following set of weights: 0.27 for the two metrics in 1); 0.13 for the  
201 two metrics in 2), 0.03 for the two metrics in 3), and 0.07 for both 4) and 5). We also tested  
202 other sets of weights and found that higher weights should be given to 1) and 2) based on  
203 results from the synthetic testing where the ‘true’ values of the state variables and parameters  
204 are known; however, in general, the final results are similar if there are minor changes to these  
205 weights.

206  
207 To account for model stochasticity, we repeat each model-inference 100 times for each  
208 dataset, each with initial parameters and variables randomly drawn from the prior distributions  
209 (Table S2). Each model-inference tests the 14 hypotheses described above, selects the one with



210 the best performance (i.e. minimizing the combined metric described above), and outputs the  
 211 estimates of the best-performing run. That is, the model estimates reported in the main text  
 212 are aggregated from 100 best-performing model runs (each with 500 ensemble members and  
 213 totaling 50,000 individual model realizations).

214

### 215 **3. Model validation using model-generated synthetic data**

216 To test the accuracy of our model-inference system, we generate 10 synthetic datasets using a  
 217 separate multi-variant SEIRS model, similar to models developed in Yang et al.<sup>16</sup> and Gog &  
 218 Grenfell.<sup>17</sup> Within this model, variants can interact via cross-immunity, which protects a  
 219 portion of individuals with prior infection (i.e. polarized immunity) by reducing transmission.  
 220 Specifically, the model takes the following form:

221

$$\left\{ \begin{array}{l} \frac{dS_i}{dt} = \frac{R_i}{L_i} - \sum_j \frac{b_t e_t m_t c_{ij} \beta_j S_j I_j}{N} - \varepsilon \\ \frac{dE_i}{dt} = \frac{b_t e_t m_t \beta_i S_i I_i}{N} - \frac{E_i}{Z_i} + \varepsilon \\ \frac{dI_i}{dt} = \frac{E_i}{Z_i} - \frac{I_i}{D_i} \\ \frac{dR_i}{dt} = \frac{I_i}{D_i} - \frac{R_i}{L_i} \end{array} \right. \quad [S4]$$

222

223 where  $N$  is the population size;  $S_i$ ,  $E_i$ ,  $I_i$ , and  $R_i$ , are, respectively, the numbers of susceptible,  
 224 exposed-but-not-yet infectious, infectious, and recovered individuals, with respect to variant- $i$   
 225 (here, the wild-type SARS-CoV-2 virus or a new variant);  $\beta_i$ ,  $D_i$ , and  $L_i$  are, respectively, the  
 226 transmission rate, mean infectious period, and mean immunity period, for variant- $i$ ; and  $c_{ij}$   
 227 measures the strength of cross-immunity to variant- $i$  conferred by infection with variant- $j$  (e.g.,  
 228 close to 0 if it is weak and  $c_{ii}=1$  for infection by the same variant). The parameter  $\varepsilon$  represents  
 229 travel-related importation of infections; to generate the synthetic data (i.e., “truths”), we set  $\varepsilon$   
 230 to 1 per week for the first 5 weeks and 1 every 3 days for the rest of the first wave (here weeks  
 231 1-20); for the second wave, as transmission has been established locally, we set  $\varepsilon$  to 0 for  
 232 simplicity. The terms  $b_t$ ,  $m_t$ , and  $e_t$  are the same as in Eqn S3 and account for seasonality and  
 233 NPIs over time. For simplicity, we omit birth, death, and vaccination.

234

235 To generate the synthetic data (i.e., “truths”), we seed the Eq. S4 model with 2 infections of  
 236 wild-type virus at the start of each simulation and 50 infections of a new variant at the start of  
 237 Week 21, for  $N = 1$  million people; we run the model stochastically with a daily time-step from  
 238 the week starting 3/1/2020 to the week starting 2/21/2021 (i.e. 52 weeks in total) using the  
 239 parameters listed in Table S3. To compute the weekly number of cases and deaths, we use the

240 same procedure as described in Section 2.2 above for each variant. We then combine the  
 241 case/mortality estimates for both variants, add random noises drawn from a Poisson  
 242 distribution to mimic observational error. The final noise-added weekly case and mortality time  
 243 series are then used as synthetic data for testing the model-inference system (described in  
 244 Section 2 above). To compare the posterior estimates of key parameters and variables (e.g.  
 245 transmissibility and population susceptibility) from the model-inference system, we compute  
 246 the true values of population susceptibility and transmissibility over time as the weighted  
 247 average of the two variants based on the relative prevalence during each week. Fig 1 and Fig S1  
 248 show the 10 model-generated truths including cases, deaths, and the computed “true” values  
 249 of population susceptibility and transmissibility for each week of the simulation.

250

#### 251 **4. Multi-variant, age-structured model for simulation to test the relative competitiveness of** 252 **VOCs and project future SARS-CoV-2 dynamics.**

253 We modify the multi-variant model in Eqn S4 to further include age structure and vaccination.  
 254 The inclusion of age structure here allows incorporation of age-specific parameters (e.g.,  
 255 transmission rate and infection-fatality risk) as well as age-specific vaccination coverage and  
 256 rates. Specifically, this multi-variant, age-structured SEIRSV model takes the following form:

$$\left\{ \begin{array}{l} \frac{dS_i^A}{dt} = \frac{R_i^A}{L_i^A} - \sum_j b_t e_t m_t c_{ij} \sum_a \frac{\beta_j^{Aa} S_j^A I_j^a}{N^a} - \varepsilon_i - v_{i,1}^A(t) - v_{i,2}^A(t) \\ \frac{dE_i^A}{dt} = \sum_j b_t e_t m_t c_{ij} \sum_a \frac{\beta_j^{Aa} S_j^A I_j^a}{N^a} - \frac{E_i^A}{Z_i^A} + \varepsilon_i \\ \frac{dI_i^A}{dt} = \frac{E_i^A}{Z_i^A} - \frac{I_i^A}{D_i^A} \\ \frac{dR_i^A}{dt} = \frac{I_i^A}{D_i^A} - \frac{R_i^A}{L_i^A} + v_{i,1}^A(t) + v_{i,2}^A(t) \end{array} \right. \quad [S5]$$

257

258 Model parameters in Eqn S5 are similar to those in Eqn S4, except for those related to age,  
 259 which are indicated by the superscripts. The vaccination model component is also similar to  
 260 Eqn S3, but with age-stratification. However, the terms  $v_{i,1}^A(t)$  and  $v_{i,2}^A(t)$  are variant-specific,  
 261 as indicated by the additional subscript  $i$ ; that is, they additionally account for the reduction in  
 262 vaccine efficacy against the new variants, based on scenario assumptions specified in Table S5.

263

264 As an example, we simulate the transmission dynamics under different scenarios of variant  
 265 prevalence, vaccine efficacy, and NPIs for a city like NYC, from the week of 4/25/2021 to the  
 266 week of 8/22/2021 (i.e., approximately May - August 2021). We use data or estimates available  
 267 for NYC to initialize the parameters and state variables needed for model simulations. In  
 268 addition, we use our model-inference estimates for the VOCs for related parameters and

269 variables. Specifically, as in previous work,<sup>9,10,18</sup> we include 8 age-groups (i.e. <1, 1-4, 5-14, 15-  
270 24, 25-44, 45-64, 65-74, and 75+ year-olds) to account for age-specific differences. To focus on  
271 the three VOCs, here we only include the B.1.1.7, B.1.351, and P.1 variants and attribute the  
272 rest as “wildtype” virus. NYC data on variant prevalence among tested infections during the  
273 weeks of March – April 2021 are used to inform the initial range of seeding for each variant  
274 (Table S5). Initial conditions for the state variables (e.g., susceptibility and SARS-CoV-2  
275 prevalence) for each age group are taken from estimates<sup>9,10,18</sup> made for the week of 4/18/2021,  
276 using detailed data (including case, mortality, COVID-19-related emergency visit, mobility, and  
277 vaccination) during 3/1/2020 – 4/24/2021. For each age group, to compute the initial variant-  
278 specific population susceptibility ( $S_i$ ) at the start of a simulation, we move the estimated  
279 proportion with immune escape for variant  $i$  among those who have had prior infection with  
280 the wild-type virus but have not been vaccinated back to the susceptible compartment. The  
281 number of people losing vaccine-induced immunity is computed based on scenario assumptions  
282 determining the reduction in vaccine efficacy (see scenarios in Table S5).

283  
284 The cross-immunity settings, i.e., values of  $c_{ij}$ 's in Eqn S5, come from our posterior model-  
285 inference estimates of immune escape and are used for all age groups. To reduce uncertainty,  
286 here we use the 80% CI estimates (see Table S5). For instance, as our model-inference estimate  
287 of immune escape for B.1.351 has an 80% CI of 40.1 – 82.8%, we set  $c(\text{B.1.351} \leftarrow \text{wildtype})$ , the  
288 cross-immune protection against B.1.351 conferred by prior infection of the wildtype virus  
289 relative to variant-specific immunity, to values drawn from a uniform distribution ranging from  
290 0.172 to 0.599 (i.e. cross-immunity is set to the complement of estimated immune escape). We  
291 set all  $c(\text{wildtype} \leftarrow \text{new variant})$  to 1 – that is, we assume full cross-immune protection against  
292 the wild-type virus conferred by infection due to any VOC.

293  
294 Similarly, the variant-specific transmission rates, i.e.  $\beta_i$ 's, come from our posterior model-  
295 inference estimates of the relative transmissibility for each variant. For instance, as our model-  
296 inference estimate of transmissibility for B.1.351 is 18.5 – 45.7% (80% CI) higher than that of  
297 the wildtype virus, we set  $\beta_{\text{B.1.351}}$  to 1.185 – 1.457 times of the estimate for  $\beta_{\text{wildtype}}$ . The same  
298 scaling is applied to all age groups.

299  
300 Due to a lack of information, we do not account for potential differences in infection fatality  
301 risk by variant; therefore, the simulated mortality under different scenarios only reflect the  
302 relative infection rate by age group, for which we apply age-specific infection-fatality risk (see  
303 Table S5). In addition, due to the uncertainty of the infection fatality risk among breakthrough  
304 infections (i.e., those who have been vaccinated), we only show mortality-related simulations  
305 for the “Same VE” scenario which assumes no reduction in VE.

306

307 We run the model for each scenario 1000 times stochastically, with the parameters and initial  
308 conditions randomly drawn from uniform distributions with ranges specified in Table S5.  
309 Results are summarized from the 1000 model runs for each scenario.

310

### 311 **References:**

- 312 1 Moriyama, M., Hugentobler, W. J. & Iwasaki, A. Seasonality of Respiratory Viral  
313 Infections. *Annu Rev Virol* **7**, 83-101, doi:10.1146/annurev-virology-012420-022445  
314 (2020).
- 315 2 Tamerius, J. *et al.* Global influenza seasonality: reconciling patterns across temperate  
316 and tropical regions. *Environ Health Perspect* **119**, 439-445, doi:10.1289/ehp.1002383  
317 (2011).
- 318 3 Baker, R. E. *et al.* Epidemic dynamics of respiratory syncytial virus in current and future  
319 climates. *Nat Commun* **10**, 5512, doi:10.1038/s41467-019-13562-y (2019).
- 320 4 Kissler, S. M., Tedijanto, C., Goldstein, E., Grad, Y. H. & Lipsitch, M. Projecting the  
321 transmission dynamics of SARS-CoV-2 through the postpandemic period. *Science* **368**,  
322 860+, doi:10.1126/science.abb5793 (2020).
- 323 5 Tamerius, J. D. *et al.* Environmental predictors of seasonal influenza epidemics across  
324 temperate and tropical climates. *PLoS Pathog* **9**, e1003194,  
325 doi:10.1371/journal.ppat.1003194 (2013).
- 326 6 Shaman, J. & Kohn, M. Absolute humidity modulates influenza survival, transmission,  
327 and seasonality. *Proc Natl Acad Sci U S A* **106**, 3243-3248, doi:10.1073/pnas.0806852106  
328 (2009).
- 329 7 Shaman, J., Pitzer, V. E., Viboud, C., Grenfell, B. T. & Lipsitch, M. Absolute humidity and  
330 the seasonal onset of influenza in the continental United States. *Plos Biol* **8**, e1000316,  
331 doi:10.1371/journal.pbio.1000316 (2010).
- 332 8 Yang, W. & Marr, L. C. Mechanisms by which ambient humidity may affect viruses in  
333 aerosols. *Appl Environ Microbiol* **78**, 6781-6788, doi:10.1128/AEM.01658-12 (2012).
- 334 9 Yang, W., Shaff, J. & Shaman, J. Effectiveness of non-pharmaceutical interventions to  
335 contain COVID-19: a case study of the 2020 spring pandemic wave in New York City. *J R*  
336 *Soc Interface* **18**, 20200822, doi:10.1098/rsif.2020.0822 (2021).
- 337 10 Yang, W. *et al.* Estimating the infection-fatality risk of SARS-CoV-2 in New York City  
338 during the spring 2020 pandemic wave: a model-based analysis. *The Lancet. Infectious*  
339 *diseases* **21**, 203-212, doi:10.1016/S1473-3099(20)30769-6 (2021).
- 340 11 Yuan, H., Kramer, S. C., Lau, E. H. Y., Cowling, B. J. & Yang, W. Modeling Influenza  
341 Seasonality in the Tropics and Subtropics. *PLoS Comput Biol* **In press** (2021).
- 342 12 Yuan, H., Kramer, S. C., Lau, E. H. Y., Cowling, B. J. & Yang, W. Modeling Influenza  
343 Seasonality in the Tropics and Subtropics. *medRxiv*, 2021.2002.2004.21251148,  
344 doi:10.1101/2021.02.04.21251148 (2021).

- 345 13 Anderson, J. L. An Ensemble Adjustment Kalman Filter for Data Assimilation. *Mon.*  
346 *Weather Rev.* **129**, 2884-2903, doi:10.1175/1520-0493(2001)129<2884:aeakff>2.0.co;2  
347 (2001).
- 348 14 Google Inc. *Community Mobility Reports*, <<https://www.google.com/covid19/mobility/>>  
349 (2020).
- 350 15 Yang, W. & Shaman, J. A simple modification for improving inference of non-linear  
351 dynamical systems. *arXiv*, 1403.6804 (2014).
- 352 16 Yang, W., Lau, E. H. Y. & Cowling, B. J. Dynamic interactions of influenza viruses in Hong  
353 Kong during 1998-2018. *PLOS Computational Biology* **16**, e1007989,  
354 doi:10.1371/journal.pcbi.1007989 (2020).
- 355 17 Gog, J. R. & Grenfell, B. T. Dynamics and selection of many-strain pathogens. *Proc Natl*  
356 *Acad Sci U S A* **99**, 17209-17214, doi:10.1073/pnas.252512799 (2002).
- 357 18 Yang, W., Kandula, S. & Shaman, J. *Projections of COVID19 Epidemic Outcomes and*  
358 *Healthcare Demands for New York City (NYC)*, <[https://github.com/wan-](https://github.com/wan-yang/COLUMBIA-COVID19-PROJECTIONS-FOR-NYC)  
359 [yang/COLUMBIA-COVID19-PROJECTIONS-FOR-NYC](https://github.com/wan-yang/COLUMBIA-COVID19-PROJECTIONS-FOR-NYC)> (2020).  
360

**Fig S1.** Model validation using model-generated synthetic data with an infection-detection rate set to 10%. (A) 5 sets of synthetic data (dots) and model-fits to each dataset; lines show mean estimates and surrounding areas show 50% (dark) and 95% (light) Crls. (B) weekly model estimated transmissibility and population susceptibility; lines show mean estimates and surrounding areas show 50% (dark) and 95% (light) Crls, compared to the true values (dots). (C) overall estimates of the change in transmissibility and immune evasion (boxes and whiskers show model estimated median, interquartile range, and 95% CI from 100 model-inference simulations) compared to the true values (dots).

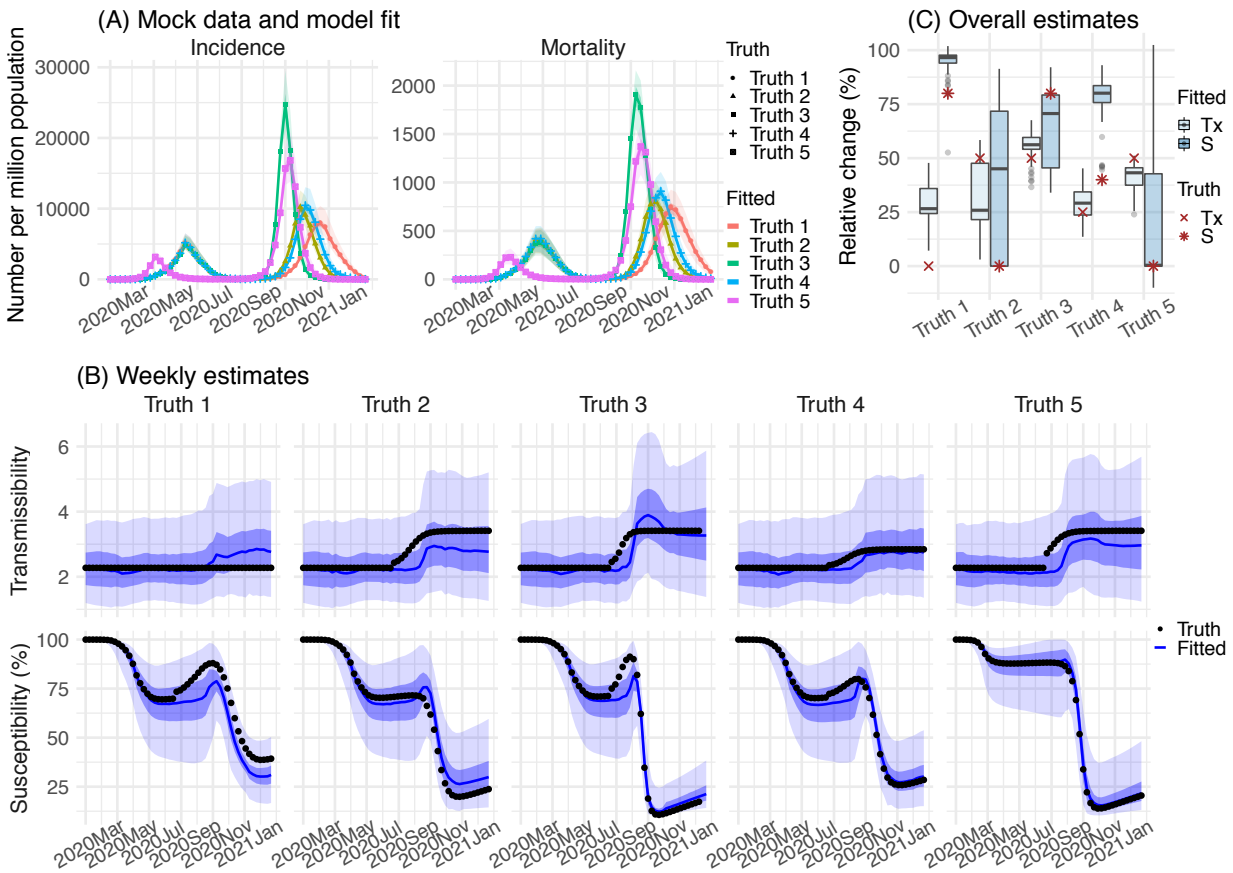



**Fig S2.** Pandemic dynamics, mobility, and estimated seasonal trends in the three countries.

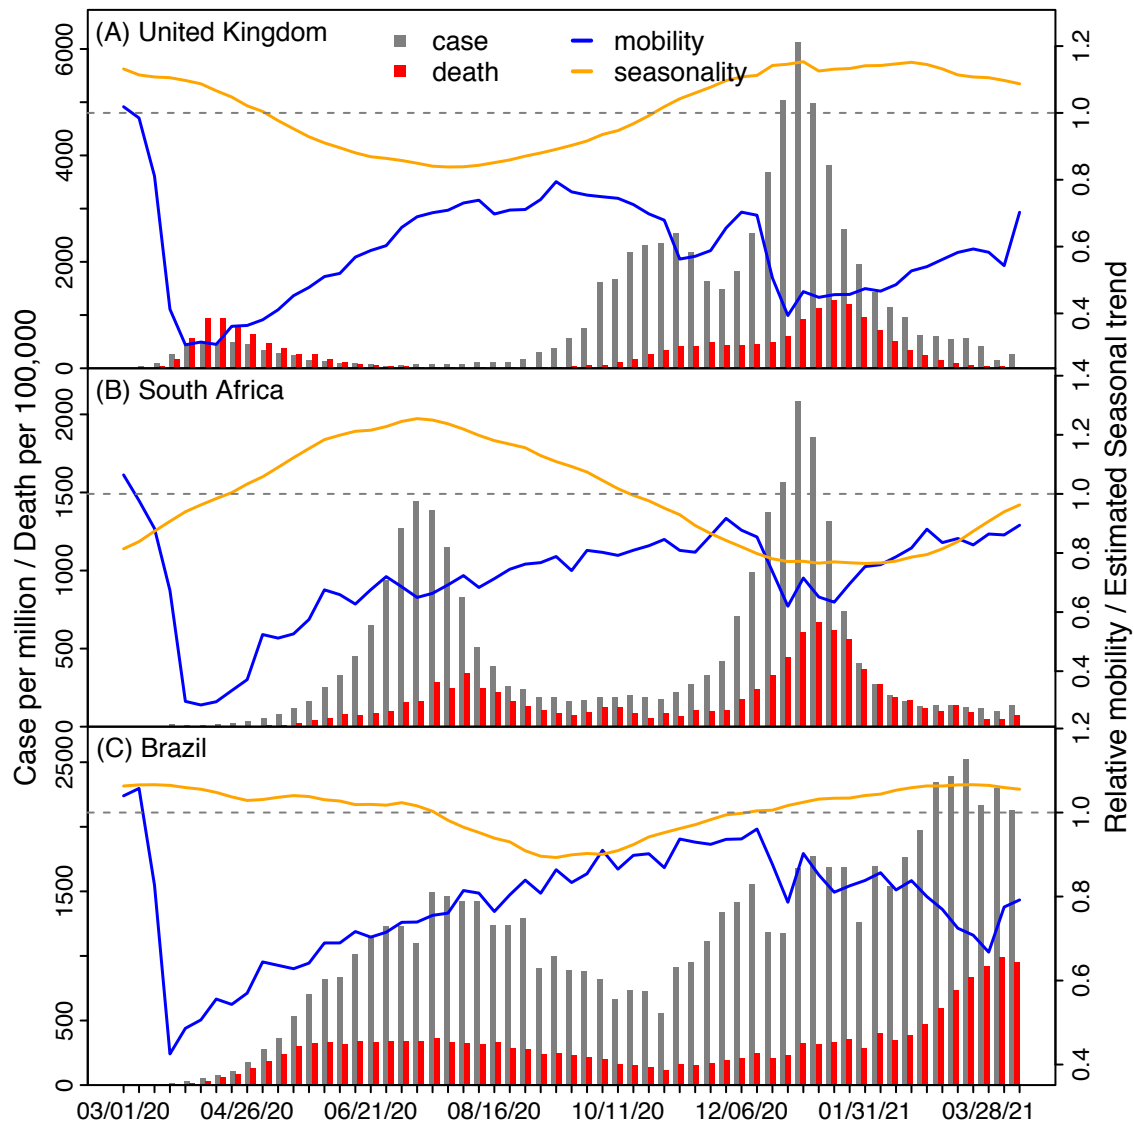

**Fig S3.** Other model estimates. Left panel shows the estimated infection-detection rate and right panel shows the estimated infection-fatality risk for each week during the study period for the three countries. For comparison, estimated weekly infection rates are superimposed in each plot (right y-axis). Blue lines and surrounding areas show model estimated mean, 50% and 95% CrIs. Boxes and whiskers show model-estimated weekly infection rates (mean, 50% and 95% CrIs). Grey shaded boxes indicate the timing of lockdowns or key period of restrictions; horizontal arrows indicate the timing of variant identification and vaccination rollout.

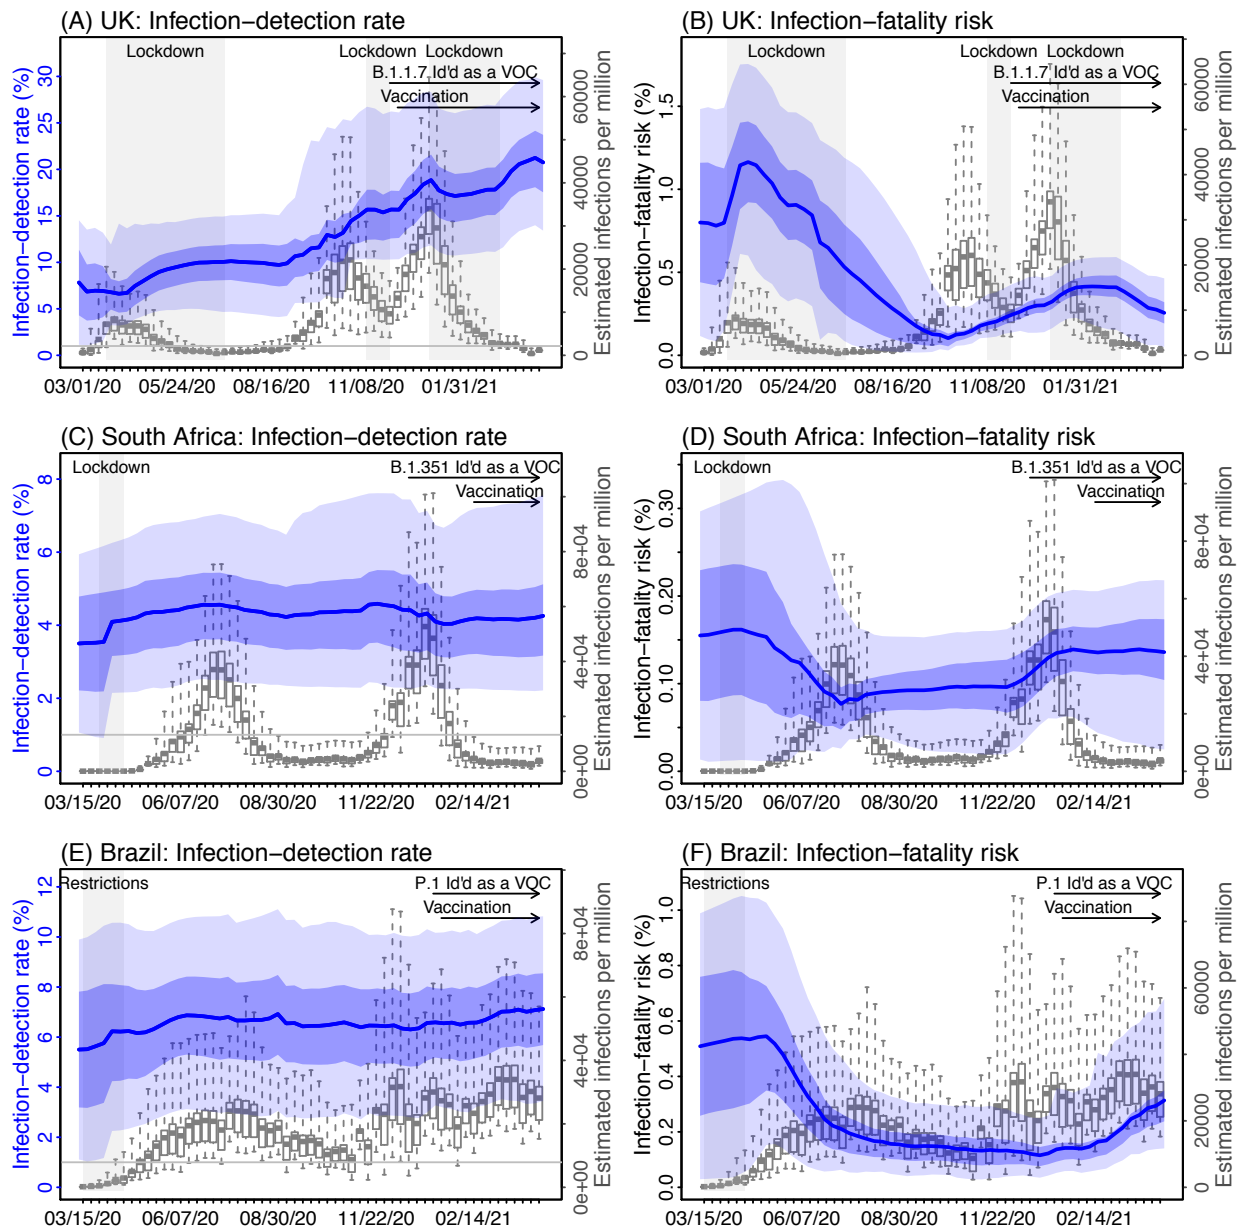

**Fig S4.** Model projections of *COVID-19* related mortality under different scenarios of VOC co-circulation and NPI. Due to the uncertainty on the infection fatality risk among breakthrough infections (i.e., those who have been vaccinated), all simulations shown here assume no reduction in vaccine efficacy (VE). All numbers are scaled for 1 million people.

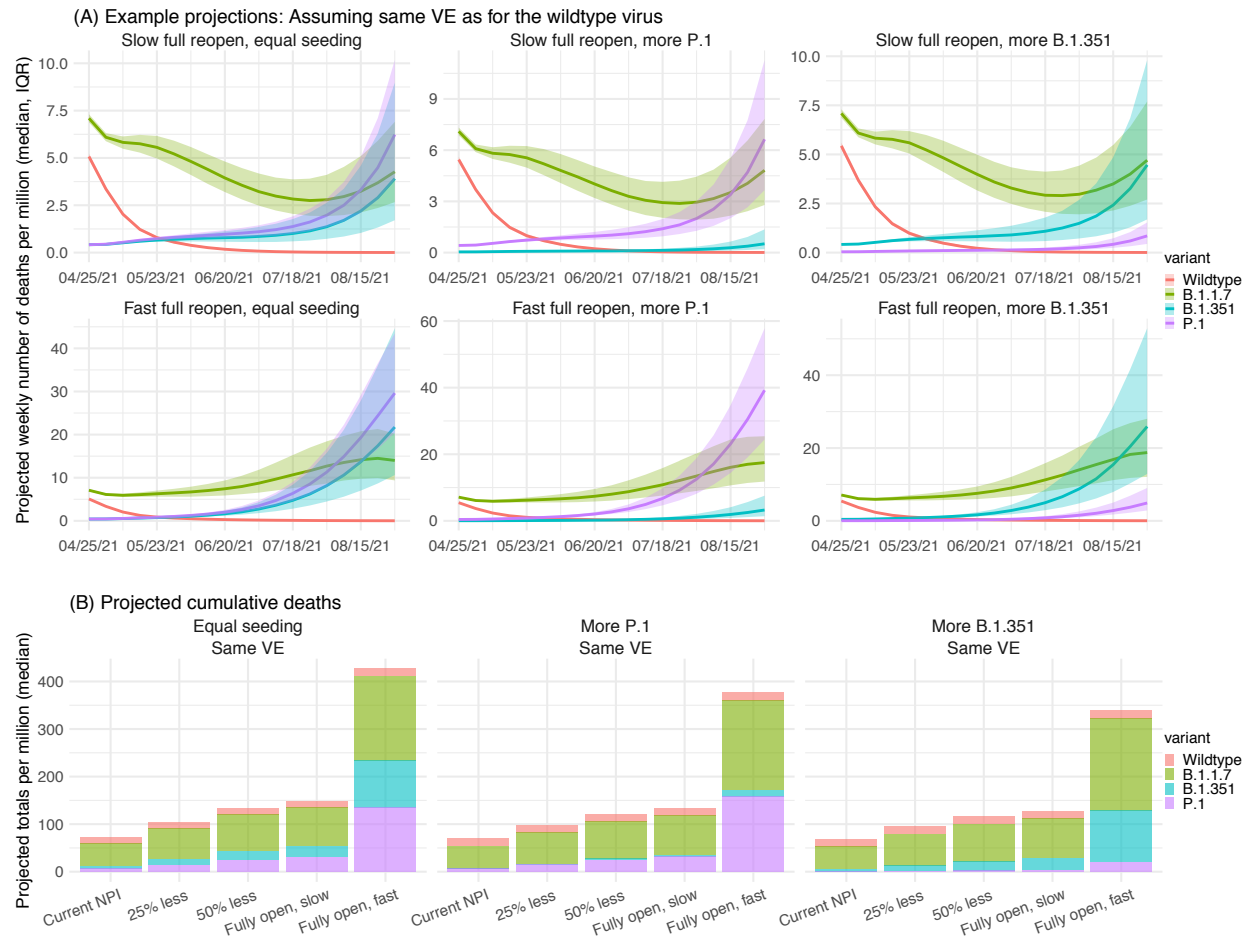

**Fig S5.** Weekly average temperature and specific humidity for the three countries.

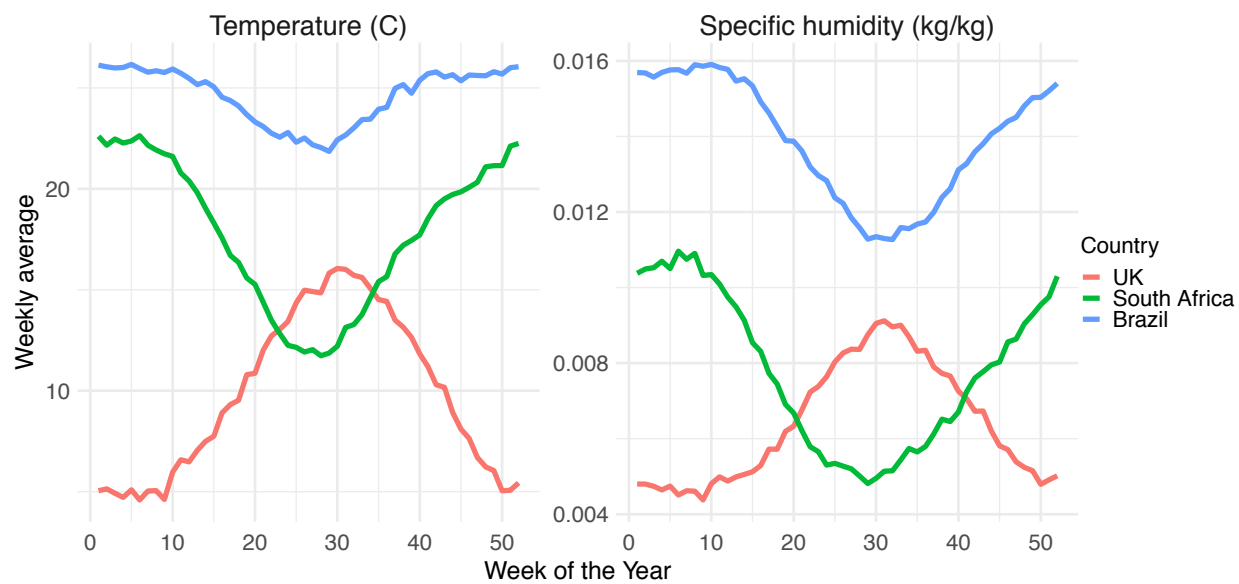

**Table S1.** Model-simulated prevalence of different variants under different scenarios. Numbers show the median (and interquartile range; all in percentage) of tallies over the entire simulation period (i.e. the week of 4/25/2021 to 8/22/2021) for each scenario, as specified in columns 1 (seeding of the B.1.351 and P.1 variant), 2 (NPI), and 3 (reduction on vaccine efficacy).

| Seeding       | NPI              | VE        | Wildtype          | B.1.1.7           | B.1.351           | P.1               |
|---------------|------------------|-----------|-------------------|-------------------|-------------------|-------------------|
| Equal seeding | Current NPI      | Same VE   | 8.7 (8.1, 9.4)    | 65.4 (62.1, 67.9) | 11.9 (9.8, 15)    | 13.2 (11.5, 15.2) |
| Equal seeding | Current NPI      | High VE   | 7.7 (7.1, 8.3)    | 63.9 (60.2, 67)   | 13.3 (10.5, 17)   | 14.3 (12.4, 16.6) |
| Equal seeding | Current NPI      | Median VE | 7.6 (6.9, 8.3)    | 63.1 (59.5, 66.3) | 13.7 (10.8, 17.6) | 14.6 (12.6, 17)   |
| Equal seeding | 25% less         | Same VE   | 5.7 (4.9, 6.5)    | 57.1 (51.4, 62.3) | 15.9 (11.3, 21.8) | 19.5 (15.9, 23.8) |
| Equal seeding | 25% less         | High VE   | 4.5 (3.8, 5.4)    | 52.6 (47, 59)     | 19 (12.8, 26.6)   | 20.9 (16.9, 26.4) |
| Equal seeding | 25% less         | Median VE | 4.3 (3.5, 5.1)    | 50.2 (43.1, 56.8) | 20.5 (13.9, 30)   | 22.2 (17.6, 27.2) |
| Equal seeding | 50% less         | Same VE   | 3.8 (3, 4.7)      | 48.2 (39.9, 54.8) | 19.5 (12.5, 29.3) | 25.5 (19.7, 32.3) |
| Equal seeding | 50% less         | High VE   | 2.8 (2.1, 3.5)    | 40.7 (32.2, 49.1) | 24.3 (14.7, 37.4) | 27.6 (21.4, 36)   |
| Equal seeding | 50% less         | Median VE | 2.5 (1.9, 3.3)    | 36.6 (28.2, 45)   | 27.8 (16.2, 41.2) | 28.7 (21.5, 37.5) |
| Equal seeding | Fully open, slow | Same VE   | 2.9 (2.2, 3.7)    | 40.5 (32.4, 49.8) | 20.9 (13.1, 35.3) | 28.9 (21.8, 38)   |
| Equal seeding | Fully open, slow | High VE   | 2 (1.5, 2.7)      | 33.9 (25.5, 43.7) | 24.8 (15.1, 41.5) | 32.5 (24, 42.2)   |
| Equal seeding | Fully open, slow | Median VE | 1.8 (1.3, 2.4)    | 30.6 (22.6, 40)   | 30.6 (17, 46.3)   | 32.5 (23.1, 42.3) |
| Equal seeding | Fully open, fast | Same VE   | 1 (0.9, 1.3)      | 26.8 (20.4, 35.4) | 30.1 (17.2, 45.5) | 36.7 (26.3, 48)   |
| Equal seeding | Fully open, fast | High VE   | 0.8 (0.6, 0.9)    | 22.4 (16.7, 30)   | 33.7 (20.4, 50.8) | 38.3 (26.7, 50.1) |
| Equal seeding | Fully open, fast | Median VE | 0.7 (0.6, 0.8)    | 19.5 (15, 26)     | 39.9 (24.1, 56.1) | 36.8 (24.9, 48.9) |
| More P.1      | Current NPI      | Same VE   | 11.9 (11.1, 12.8) | 71.5 (69.4, 73.5) | 1.6 (1.2, 2.1)    | 14.6 (12.9, 16.7) |
| More P.1      | Current NPI      | High VE   | 10.8 (9.9, 11.6)  | 70.9 (68.5, 73.3) | 1.7 (1.3, 2.4)    | 16.1 (13.9, 18.6) |
| More P.1      | Current NPI      | Median VE | 10.6 (9.8, 11.5)  | 70.9 (68.1, 73.1) | 1.9 (1.4, 2.5)    | 16.3 (14.1, 18.9) |
| More P.1      | 25% less         | Same VE   | 8.2 (7.1, 9.4)    | 66 (61.6, 69.9)   | 2.4 (1.6, 3.5)    | 22.4 (18.4, 27.5) |
| More P.1      | 25% less         | High VE   | 6.9 (5.8, 7.9)    | 63.6 (57.7, 68.2) | 2.7 (1.7, 4.4)    | 26 (21.2, 31.9)   |
| More P.1      | 25% less         | Median VE | 6.6 (5.6, 7.5)    | 62 (56.4, 66.5)   | 3.1 (1.9, 5.1)    | 27.3 (22.6, 33)   |
| More P.1      | 50% less         | Same VE   | 5.7 (4.6, 7)      | 58.6 (50.8, 64.8) | 3 (1.7, 5)        | 31.1 (24.6, 39.6) |
| More P.1      | 50% less         | High VE   | 4.4 (3.4, 5.4)    | 52.5 (44.6, 59.7) | 3.9 (2, 7.5)      | 36.5 (29.2, 45.7) |

|              |                  |           |                   |                   |                   |                   |
|--------------|------------------|-----------|-------------------|-------------------|-------------------|-------------------|
| More P.1     | 50% less         | Median VE | 4.1 (3.2, 5.1)    | 49.7 (42.3, 56.9) | 4.5 (2.3, 8.5)    | 39.3 (32.1, 47.4) |
| More P.1     | Fully open, slow | Same VE   | 4.4 (3.4, 5.8)    | 53.3 (44.5, 60.5) | 3.5 (1.8, 6.8)    | 36.8 (28.8, 46.1) |
| More P.1     | Fully open, slow | High VE   | 3.2 (2.5, 4.2)    | 45 (36.8, 53.6)   | 4.4 (2.3, 8.8)    | 45 (35.7, 53.9)   |
| More P.1     | Fully open, slow | Median VE | 3 (2.3, 3.9)      | 43 (34.3, 50.8)   | 4.9 (2.5, 10.3)   | 45.6 (36.1, 55.6) |
| More P.1     | Fully open, fast | Same VE   | 1.6 (1.3, 2)      | 36.1 (28.6, 45.2) | 5.1 (2.3, 10.8)   | 53.2 (43.8, 63.2) |
| More P.1     | Fully open, fast | High VE   | 1.2 (1, 1.4)      | 30.9 (24.3, 39.2) | 6.9 (3, 14.2)     | 56.7 (47.8, 66.2) |
| More P.1     | Fully open, fast | Median VE | 1 (0.9, 1.3)      | 27.8 (21.9, 35.4) | 8.4 (3.9, 17.1)   | 58.8 (47.7, 67.4) |
| More B.1.351 | Current NPI      | Same VE   | 12.1 (11.3, 12.9) | 72.5 (69.8, 74.8) | 13.2 (10.9, 16.6) | 1.8 (1.5, 2.2)    |
| More B.1.351 | Current NPI      | High VE   | 10.9 (10, 11.8)   | 72.2 (68.7, 74.9) | 14.6 (11.5, 18.6) | 1.9 (1.5, 2.4)    |
| More B.1.351 | Current NPI      | Median VE | 10.6 (9.8, 11.5)  | 71.5 (67.6, 74.6) | 15.5 (12.3, 19.8) | 2 (1.6, 2.5)      |
| More B.1.351 | 25% less         | Same VE   | 8.4 (7.2, 9.6)    | 68.9 (62, 73.6)   | 19.3 (13.7, 27)   | 2.8 (2, 3.8)      |
| More B.1.351 | 25% less         | High VE   | 7 (5.9, 8.1)      | 66.9 (58.1, 72.6) | 22.3 (15.6, 32.3) | 3.2 (2.3, 4.5)    |
| More B.1.351 | 25% less         | Median VE | 6.5 (5.4, 7.8)    | 62.9 (53.8, 70.5) | 26.3 (17.5, 36.5) | 3.3 (2.4, 4.7)    |
| More B.1.351 | 50% less         | Same VE   | 5.9 (4.7, 7.3)    | 62.7 (51.1, 70.5) | 26.4 (17.1, 39.2) | 4.1 (2.7, 6)      |
| More B.1.351 | 50% less         | High VE   | 4.5 (3.5, 5.8)    | 56.6 (43.7, 67.4) | 32.4 (20.1, 46.9) | 4.9 (3.3, 7.3)    |
| More B.1.351 | 50% less         | Median VE | 4.1 (3, 5.3)      | 53 (39.6, 63.4)   | 36.8 (24.3, 52.5) | 5 (3.2, 7.6)      |
| More B.1.351 | Fully open, slow | Same VE   | 4.7 (3.5, 6.2)    | 58.2 (43.8, 68.5) | 30.7 (18, 47)     | 4.9 (3.2, 7.6)    |
| More B.1.351 | Fully open, slow | High VE   | 3.4 (2.4, 4.6)    | 50 (35.9, 62.4)   | 38.5 (23.5, 56.1) | 5.7 (3.5, 8.9)    |
| More B.1.351 | Fully open, slow | Median VE | 3.1 (2.2, 4.2)    | 44.7 (30.9, 57.4) | 43.6 (28.2, 61)   | 5.9 (3.3, 9.5)    |
| More B.1.351 | Fully open, fast | Same VE   | 1.7 (1.3, 2.3)    | 42.2 (28.6, 55.5) | 44.4 (28.7, 63.1) | 7.5 (4.4, 13.1)   |
| More B.1.351 | Fully open, fast | High VE   | 1.2 (1, 1.6)      | 34.4 (23, 48.2)   | 53.4 (35.1, 69.1) | 8.2 (4.7, 13.7)   |
| More B.1.351 | Fully open, fast | Median VE | 1.1 (0.8, 1.4)    | 29.2 (19.9, 41.9) | 59.7 (42.1, 72.6) | 7.7 (4.3, 13.2)   |



**Table S2.** Prior ranges for the parameters used in the model-inference system for the three countries.

| Parameter/<br>variable             | Symbol   | Prior range                                                                                                                                                | Source/rationale                                                                                                                                                                                                     |
|------------------------------------|----------|------------------------------------------------------------------------------------------------------------------------------------------------------------|----------------------------------------------------------------------------------------------------------------------------------------------------------------------------------------------------------------------|
| Initial exposed                    | $E(t=0)$ | 5 – 50 times (for the UK), 1 – 10 times (for South Africa), or 2.5 – 25 times (for Brazil) of the reported number of cases on the first week of simulation | Low infection-detection rate in first weeks; likely higher initial introduction for the UK due to more international travel per capita.                                                                              |
| Initial infectious                 | $I(t=0)$ | Same as for $E(t=0)$                                                                                                                                       |                                                                                                                                                                                                                      |
| Initial susceptible                | $S(t=0)$ | 99 – 100% of the population                                                                                                                                | Almost everyone is susceptible initially                                                                                                                                                                             |
| Population size                    | $N$      | N/A                                                                                                                                                        | Based on data                                                                                                                                                                                                        |
| Variant-specific transmission rate | $\beta$  | [0.5, 0.8] for the UK; [0.4, 0.7] for South Africa; [0.4, 0.8] for Brazil                                                                                  | Based on $R_0$ estimates of around 1.5-4 for SARS-CoV-2. <sup>1-3</sup> Slightly lower ranges are used for South Africa and Brazil, as initial testing showed that the priors tend to overestimate the observations. |
| Scaling of effectiveness of NPI    | $e$      | [0.5, 1.5]                                                                                                                                                 | Around 1, with a large bound to be flexible.                                                                                                                                                                         |

---

|                                                                  |          |                                                                 |                                                                                                                                                                                                                              |
|------------------------------------------------------------------|----------|-----------------------------------------------------------------|------------------------------------------------------------------------------------------------------------------------------------------------------------------------------------------------------------------------------|
| Latency period                                                   | $Z$      | [2, 5] days                                                     | Incubation period: 5.2 days (95% CI: 4.1, 7) <sup>1</sup> ; latency period is likely shorter than the incubation period                                                                                                      |
| Infectious period                                                | $D$      | [2, 5] days                                                     | Time from symptom onset to hospitalization: 3.8 days (95% CI: 0, 12.0) in China, <sup>4</sup> plus 1-2 days viral shedding before symptom onset. We did not distinguish symptomatic/asymptomatic infections.                 |
| Immunity period                                                  | $L$      | [730, 1095] days                                                | Assuming immunity lasts for 2-3 years                                                                                                                                                                                        |
| Mean of time from viral shedding to diagnosis                    | $T_m$    | [5, 7] days for the UK, [5, 8] days for South Africa and Brazil | From a few days to a week from symptom onset to diagnosis/reporting, <sup>4</sup> plus 1-2 days of viral shedding (being infectious) before symptom onset. There may be a slightly longer delay for South Africa and Brazil. |
| Standard deviation (SD) of time from viral shedding to diagnosis | $T_{sd}$ | [1, 3] days                                                     | To allow variation in time to diagnosis/reporting                                                                                                                                                                            |

---

---

|                               |     |                                                                                                                                                                                                                                                                                                                                                                                                                                                                                                                                                                                                                                                                                                                                                                                       |                                                                                                                                                                                                                                                                                                                                                                                                                                                                                                                                                                                                                                                                                                                          |
|-------------------------------|-----|---------------------------------------------------------------------------------------------------------------------------------------------------------------------------------------------------------------------------------------------------------------------------------------------------------------------------------------------------------------------------------------------------------------------------------------------------------------------------------------------------------------------------------------------------------------------------------------------------------------------------------------------------------------------------------------------------------------------------------------------------------------------------------------|--------------------------------------------------------------------------------------------------------------------------------------------------------------------------------------------------------------------------------------------------------------------------------------------------------------------------------------------------------------------------------------------------------------------------------------------------------------------------------------------------------------------------------------------------------------------------------------------------------------------------------------------------------------------------------------------------------------------------|
| Infection-detection rate      | $r$ | <p><u>For the UK:</u> starting from U[0.01, 0.15] at time 0 and allowed to increase over time using space re-probing<sup>5</sup> with values drawn from U[0.1, 0.24] starting at week 5 (the week of 3/29/2020), U[0.05, 0.2] during the summer (July – Aug 2020), U[0.1, 0.3] starting Sep 2020, and U[0.15, 0.3] starting Nov 2020.</p> <p><u>For South Africa:</u> starting from U[0.01, 0.06] at time 0 and allowed to change over time using space re-probing<sup>5</sup> with values drawn from U[0.02, 0.08] starting at week 5 (the week of 4/12/2020).</p> <p><u>For Brazil:</u> starting from U[0.01, 0.1] at time 0 and allowed to change over time using space re-probing<sup>5</sup> with values drawn from U[0.02, 0.1] starting at week 5 (the week of 4/12/2020).</p> | <p>Large uncertainties; therefore, in general we use large prior bounds and large bounds for space re-probing (SR). Note that SR is only applied to 3-10% of the ensemble members and <math>r</math> can migrate outside either the initial range or the SR ranges during EAKF update. Efforts were made in the UK to increase detection of infection; however, detection during the summer of 2020 was likely lower because more infections at the time occurred among younger age groups with no or mild symptoms. In South Africa, due to the younger age structure in the population, infection detection rates were likely lower. In Brazil, infection-detection rates were likely low throughout the pandemic.</p> |
| Infection fatality risk (IFR) |     | <p><u>For the UK:</u> starting from U[0.001, 0.015] at time 0 and allowed to change over time using space re-probing<sup>5</sup> with values drawn from U[0.0001, 0.003] during Jun – Sep 2020 when infections occurred mostly among younger ages, values drawn from U[0.0001, 0.005] during Oct – Dec 2020, and [0.0001, 0.006] during Jan – Apr 2021 to account for higher IFR for B.1.1.7.</p> <p><u>For South Africa:</u> starting from [0.0001, 0.003] at time 0 and allowed to change over time using space re-probing<sup>5</sup></p>                                                                                                                                                                                                                                          | <p>Based on previous estimates<sup>6</sup> but extend to have wider ranges. Note that SR is only applied to 3-10% of the ensemble members and IFR can migrate outside either the initial range or the SR ranges during EAKF update.</p>                                                                                                                                                                                                                                                                                                                                                                                                                                                                                  |

---

---

with values drawn from  $U[0.0001, 0.0015]$  during the week of 4/19/2020 to the week of 7/5/2020 when case fatality risk was lower as computed from the data, values drawn from  $U[0.0001, 0.002]$  starting the week of 12/13/2020 with the rise of B.1.351.

For Brazil: starting from  $U[0.001, 0.01]$  at time 0 and allowed to change over time using space re-probing<sup>5</sup> with values drawn from  $U[0.0001, 0.007]$  starting at week 5 (the week of 4/12/2020), values drawn from  $U[0.0001, 0.0035]$  during the week of 6/21/2020 to the week of 11/8/2020 when case fatality risk was lower as computed from the data, values drawn from  $U[0.0001, 0.006]$  starting the week of 1/3/2021 with the rise of P.1, and values drawn from  $U[0.0001, 0.01]$  starting the week of 2/7/2021 when the healthcare systems began to be overwhelmed.

Vaccine efficacy (VE)

For the UK: VE = 85% fourteen days after the 1<sup>st</sup> dose, and 95% seven days after the 2<sup>nd</sup> dose.

For South Africa: VE = 60% fourteen days after the 1<sup>st</sup> dose; no 2<sup>nd</sup> dose (for J&J vaccine).

For Brazil: VE = 45% fourteen days after the 1<sup>st</sup> dose, and 55% seven days after the 2<sup>nd</sup> dose.

During our study period (up to mid-April 2021), the UK mostly used the Pfizer and later on Oxford/AstraZeneca vaccine, both shown to be highly effective against both the wildtype virus and B.1.1.7. South Africa mostly used the J&J vaccine with just one dose. Brazil mostly used the Sinovac and Oxford/AstraZeneca vaccines with relatively lower VE against P.1.

---

References:

- 1 Li, Q. *et al.* Early Transmission Dynamics in Wuhan, China, of Novel Coronavirus–Infected Pneumonia. *New Engl J Med*, doi:10.1056/NEJMoa2001316 (2020).
- 2 Wu, J. T., Leung, K. & Leung, G. M. Nowcasting and forecasting the potential domestic and international spread of the 2019-nCoV outbreak originating in Wuhan, China: a modelling study. *Lancet*, doi:10.1016/S0140-6736(20)30260-9 (2020).
- 3 Li, R. *et al.* Substantial undocumented infection facilitates the rapid dissemination of novel coronavirus (SARS-CoV-2). *Science* **368**, 489-493, doi:10.1126/science.abb3221 (2020).
- 4 Zhang, J. *et al.* Evolving epidemiology and transmission dynamics of coronavirus disease 2019 outside Hubei province, China: a descriptive and modelling study. *The Lancet. Infectious diseases*, doi:10.1016/S1473-3099(20)30230-9 (2020).
- 5 Yang, W. & Shaman, J. A simple modification for improving inference of non-linear dynamical systems. *arXiv*, 1403.6804 (2014).
- 6 Verity, R. *et al.* Estimates of the severity of coronavirus disease 2019: a model-based analysis. *The Lancet. Infectious diseases*, doi:10.1016/S1473-3099(20)30243-7 (2020).

**Table S3.** Parameters used to generate the synthetic data for model validation

| Truth                                     | Settings                                                                                                                                                                                                                     |
|-------------------------------------------|------------------------------------------------------------------------------------------------------------------------------------------------------------------------------------------------------------------------------|
| Wildtype-virus,<br>same for<br>all truths | $\beta = 0.65$ per day; $Z = 3.5$ days; $D = 3.5$ days; $L = 2.5$ years; $T_m = 6$ days; $T_{sd} = 2$ days; IFR = 0.7%                                                                                                       |
| Variant in<br>Truth 1                     | Large outbreak during the first wave (See Figs 1 and S1). No increase in transmissibility (i.e. same $\beta$ and $D$ as for the wildtype virus); 80% increase in immune escape. Other parameters same as the wildtype virus. |
| Variant in<br>Truth 2                     | Large outbreak during the first wave (See Figs 1 and S1). 50% increase in transmissibility (i.e. $\beta = 0.65 \times 1.5 = 0.975$ per day); no immune escape. Other parameters same as the wildtype virus.                  |
| Variant in<br>Truth 3                     | Large outbreak during the first wave (See Figs 1 and S1). 50% increase in transmissibility (i.e. $\beta = 0.65 \times 1.5 = 0.975$ per day); 80% increase in immune escape. Other parameters same as the wildtype virus.     |
| Variant in<br>Truth 4                     | Large outbreak during the first wave (See Figs 1 and S1). 25% increase in transmissibility (i.e. $\beta = 0.65 \times 1.25 = 0.8125$ per day); 40% increase in immune escape. Other parameters same as the wildtype virus.   |
| Variant in<br>Truth 5                     | Small outbreak during the first wave (See Figs 1 and S1). 50% increase in transmissibility (i.e. $\beta = 0.65 \times 1.5 = 0.975$ per day); no immune escape. Other parameters same as the wildtype virus.                  |
| Infection-<br>detection<br>rate           | 20% for results shown in Fig 1 and 10% for results shown in Fig S1.                                                                                                                                                          |



**Table S4.** Cumulative vaccination coverage used in the multi-variant, age-structured model simulations. Baseline vaccination coverage (as of 4/24/2021) is based on data for NYC. Projected vaccination rates for the simulation period (from the week starting 4/25/2021 to the week ending 8/29/2021) are based on data 10 days preceding the simulation and assuming a cumulative vaccination uptake of 80%. Note that ages under 15 (i.e., <1, 1-4, 5-14 years) are combined in the same column as they were not eligible to receive the vaccines at the time of this study. In addition, the numbers are aggregated from neighborhood-level estimates and thus could slightly exceed the 80% total for some age groups when some neighborhoods had actual vaccination coverage above 80% at baseline.

| Time point           | Vaccine dose | Vaccination coverage (%) by age group (in year) |       |       |       |       |      |
|----------------------|--------------|-------------------------------------------------|-------|-------|-------|-------|------|
|                      |              | 0-14                                            | 15-24 | 25-44 | 45-64 | 65-74 | 75+  |
| Start of simulation: | 1st dose     | 0                                               | 25.4  | 41.7  | 52.9  | 69    | 58.2 |
| 4/24/2021            | 2nd dose     | 0                                               | 10.5  | 26.7  | 40.7  | 62.6  | 53.6 |
| End of simulation:   | 1st dose     | 0                                               | 70    | 76    | 79.1  | 80.6  | 76.8 |
| 8/29/2021            | 2nd dose     | 0                                               | 65.4  | 73.4  | 78.7  | 80.3  | 74.5 |

**Table S5.** Parameter settings for different scenarios to simulate and project the impact of different variants of concern. Initial conditions and parameters are randomly drawn from uniform distributions with lower and upper bounds as specified below, based on estimates for NYC made for the week of 4/18/2021 using data during 3/1/2020 – 4/24/2021. Numbers associated with the parameter names denote the corresponding age groups.

| scenario:<br>Seeding/VE/NPI | variant  | parameter                                                                                                          | lower bound                                             | upper bound |
|-----------------------------|----------|--------------------------------------------------------------------------------------------------------------------|---------------------------------------------------------|-------------|
| Equal seeding               | wildtype | Initial seeding (%)                                                                                                | 45                                                      | 61          |
| Equal seeding               | B.1.1.7  | Initial seeding (%)                                                                                                | 35                                                      | 45          |
| Equal seeding               | B.1.351  | Initial seeding (%)                                                                                                | 2                                                       | 5           |
| Equal seeding               | P.1      | Initial seeding (%)                                                                                                | 2                                                       | 5           |
| More B.1.351                | wildtype | Initial seeding (%)                                                                                                | 49.4                                                    | 62.8        |
| More B.1.351                | B.1.1.7  | Initial seeding (%)                                                                                                | 35                                                      | 45          |
| More B.1.351                | B.1.351  | Initial seeding (%)                                                                                                | 2                                                       | 5           |
| More B.1.351                | P.1      | Initial seeding (%)                                                                                                | 0.2                                                     | 0.6         |
| More P.1                    | wildtype | Initial seeding (%)                                                                                                | 49.4                                                    | 62.8        |
| More P.1                    | B.1.1.7  | Initial seeding (%)                                                                                                | 35                                                      | 45          |
| More P.1                    | B.1.351  | Initial seeding (%)                                                                                                | 0.2                                                     | 0.6         |
| More P.1                    | P.1      | Initial seeding (%)                                                                                                | 2                                                       | 5           |
| All                         | All      | Travel-related importation, $\epsilon_i$                                                                           | 1 per 21 days, for the entire city ( $N = 8.4$ million) |             |
| Same VE                     | wildtype | VE = 85% fourteen days after the 1st dose and 95% seven days after the 2nd days                                    |                                                         |             |
| Same VE                     | B.1.1.7  | VE = 85% fourteen days after the 1st dose and 95% seven days after the 2nd days                                    |                                                         |             |
| Same VE                     | B.1.351  | VE = 85% fourteen days after the 1st dose and 95% seven days after the 2nd days                                    |                                                         |             |
| Same VE                     | P.1      | VE = 85% fourteen days after the 1st dose and 95% seven days after the 2nd days                                    |                                                         |             |
| High VE                     | wildtype | VE = 85% fourteen days after the 1st dose and 95% seven days after the 2nd days                                    |                                                         |             |
| High VE                     | B.1.1.7  | VE = 85% x .95 = 80.75% fourteen days after the 1st dose and 95% seven days after the 2nd days                     |                                                         |             |
| High VE                     | B.1.351  | VE = 85% x .80 = 68% fourteen days after the 1st dose and VE = 95% x .9 = 85.5% seven days after the 2nd days      |                                                         |             |
| High VE                     | P.1      | VE = 85% x .85 = 72.25% fourteen days after the 1st dose and VE = 95% x .95 = 90.25% seven days after the 2nd days |                                                         |             |

|                   |              |                                                                                                                    |        |        |
|-------------------|--------------|--------------------------------------------------------------------------------------------------------------------|--------|--------|
| Median VE         | wildtype     | VE = 85% fourteen days after the 1st dose and 95% seven days after the 2nd days                                    |        |        |
| Median VE         | B.1.1.7      | VE = 85% x .95 = 80.75% fourteen days after the 1st dose and VE = 95% x .95 = 90.25% seven days after the 2nd days |        |        |
| Median VE         | B.1.351      | VE = 85% x .70 = 59.5% fourteen days after the 1st dose and VE = 95% x .8 = 76% seven days after the 2nd days      |        |        |
| Median VE         | P.1          | VE = 85% x .8 = 68% fourteen days after the 1st dose and VE = 95% x .9 = 85.5% seven days after the 2nd days       |        |        |
| Current NPI       | all variants | no further increase in transmission rate                                                                           |        |        |
| 25% less NPI      | all variants | transmission rate increases by 5% per week up to 25% in total                                                      |        |        |
| 50% less NPI      | all variants | transmission rate increases by 5% per week up to 50% in total                                                      |        |        |
| Full reopen, slow | all variants | transmission rate increases by 5% per week up to fully reopen (~85% of current level)                              |        |        |
| Full reopen, fast | all variants | transmission rate increases by 10% per week up to fully reopen (~85% of current level)                             |        |        |
|                   | wildtype     | $\beta_{11}$ (per day, same below)                                                                                 | 0.11   | 0.16   |
|                   | wildtype     | $\beta_{22}$                                                                                                       | 0.078  | 0.11   |
|                   | wildtype     | $\beta_{33}$                                                                                                       | 0.11   | 0.15   |
|                   | wildtype     | $\beta_{44}$                                                                                                       | 0.13   | 0.19   |
|                   | wildtype     | $\beta_{55}$                                                                                                       | 0.16   | 0.25   |
|                   | wildtype     | $\beta_{66}$                                                                                                       | 0.13   | 0.19   |
|                   | wildtype     | $\beta_{77}$                                                                                                       | 0.13   | 0.19   |
|                   | wildtype     | $\beta_{88}$                                                                                                       | 0.11   | 0.16   |
|                   | wildtype     | $\beta_{12}$                                                                                                       | 0.055  | 0.08   |
|                   | wildtype     | $\beta_{13}$                                                                                                       | 0.014  | 0.021  |
|                   | wildtype     | $\beta_{14}$                                                                                                       | 0.0057 | 0.0084 |
|                   | wildtype     | $\beta_{15}$                                                                                                       | 0.018  | 0.026  |
|                   | wildtype     | $\beta_{16}$                                                                                                       | 0.0082 | 0.012  |
|                   | wildtype     | $\beta_{17}$                                                                                                       | 0.0058 | 0.0085 |
|                   | wildtype     | $\beta_{18}$                                                                                                       | 0.004  | 0.0059 |
|                   | wildtype     | $\beta_{21}$                                                                                                       | 0.039  | 0.055  |
|                   | wildtype     | $\beta_{23}$                                                                                                       | 0.01   | 0.014  |
|                   | wildtype     | $\beta_{24}$                                                                                                       | 0.0041 | 0.0058 |
|                   | wildtype     | $\beta_{25}$                                                                                                       | 0.013  | 0.018  |
|                   | wildtype     | $\beta_{26}$                                                                                                       | 0.0059 | 0.0083 |

---

|          |              |        |        |
|----------|--------------|--------|--------|
| wildtype | $\beta_{27}$ | 0.0042 | 0.0059 |
| wildtype | $\beta_{28}$ | 0.0029 | 0.004  |
| wildtype | $\beta_{31}$ | 0.013  | 0.018  |
| wildtype | $\beta_{32}$ | 0.013  | 0.018  |
| wildtype | $\beta_{34}$ | 0.0066 | 0.0089 |
| wildtype | $\beta_{35}$ | 0.0087 | 0.012  |
| wildtype | $\beta_{36}$ | 0.0048 | 0.0066 |
| wildtype | $\beta_{37}$ | 0.0034 | 0.0046 |
| wildtype | $\beta_{38}$ | 0.0044 | 0.006  |
| wildtype | $\beta_{41}$ | 0.0073 | 0.011  |
| wildtype | $\beta_{42}$ | 0.0073 | 0.011  |
| wildtype | $\beta_{43}$ | 0.012  | 0.017  |
| wildtype | $\beta_{45}$ | 0.012  | 0.017  |
| wildtype | $\beta_{46}$ | 0.0089 | 0.013  |
| wildtype | $\beta_{47}$ | 0.0032 | 0.0046 |
| wildtype | $\beta_{48}$ | 0.0059 | 0.0086 |
| wildtype | $\beta_{51}$ | 0.075  | 0.12   |
| wildtype | $\beta_{52}$ | 0.075  | 0.12   |
| wildtype | $\beta_{53}$ | 0.061  | 0.096  |
| wildtype | $\beta_{54}$ | 0.048  | 0.076  |
| wildtype | $\beta_{56}$ | 0.046  | 0.073  |
| wildtype | $\beta_{57}$ | 0.028  | 0.043  |
| wildtype | $\beta_{58}$ | 0.027  | 0.042  |
| wildtype | $\beta_{61}$ | 0.04   | 0.058  |
| wildtype | $\beta_{62}$ | 0.04   | 0.058  |
| wildtype | $\beta_{63}$ | 0.033  | 0.047  |
| wildtype | $\beta_{64}$ | 0.039  | 0.056  |
| wildtype | $\beta_{65}$ | 0.04   | 0.058  |
| wildtype | $\beta_{67}$ | 0.044  | 0.064  |
| wildtype | $\beta_{68}$ | 0.04   | 0.058  |
| wildtype | $\beta_{71}$ | 0.024  | 0.035  |
| wildtype | $\beta_{72}$ | 0.024  | 0.035  |
| wildtype | $\beta_{73}$ | 0.017  | 0.025  |
| wildtype | $\beta_{74}$ | 0.0074 | 0.011  |
| wildtype | $\beta_{75}$ | 0.018  | 0.025  |
| wildtype | $\beta_{76}$ | 0.025  | 0.036  |
| wildtype | $\beta_{78}$ | 0.051  | 0.074  |

---

|          |                                   |          |         |
|----------|-----------------------------------|----------|---------|
| wildtype | $\beta_{81}$                      | 0.017    | 0.024   |
| wildtype | $\beta_{82}$                      | 0.017    | 0.024   |
| wildtype | $\beta_{83}$                      | 0.018    | 0.025   |
| wildtype | $\beta_{84}$                      | 0.013    | 0.018   |
| wildtype | $\beta_{85}$                      | 0.016    | 0.023   |
| wildtype | $\beta_{86}$                      | 0.028    | 0.04    |
| wildtype | $\beta_{87}$                      | 0.043    | 0.061   |
| wildtype | Z <sub>1</sub> (days, same below) | 3.3      | 4.3     |
| wildtype | Z <sub>2</sub>                    | 3.3      | 4.3     |
| wildtype | Z <sub>3</sub>                    | 3.4      | 4.4     |
| wildtype | Z <sub>4</sub>                    | 3.4      | 4.4     |
| wildtype | Z <sub>5</sub>                    | 3.5      | 4.4     |
| wildtype | Z <sub>6</sub>                    | 3.5      | 4.5     |
| wildtype | Z <sub>7</sub>                    | 3.4      | 4.5     |
| wildtype | Z <sub>8</sub>                    | 3.3      | 4.4     |
| wildtype | D <sub>1</sub>                    | 3.1      | 4       |
| wildtype | D <sub>2</sub>                    | 3.1      | 4.1     |
| wildtype | D <sub>3</sub>                    | 3        | 4       |
| wildtype | D <sub>4</sub>                    | 3.3      | 4.2     |
| wildtype | D <sub>5</sub>                    | 3.2      | 4.2     |
| wildtype | D <sub>6</sub>                    | 3.3      | 4.2     |
| wildtype | D <sub>7</sub>                    | 3.5      | 4.4     |
| wildtype | D <sub>8</sub>                    | 3.3      | 4.3     |
| wildtype | IFR <sub>1</sub>                  | 7.70E-05 | 0.00012 |
| wildtype | IFR <sub>2</sub>                  | 7.60E-05 | 0.00013 |
| wildtype | IFR <sub>3</sub>                  | 7.70E-05 | 0.00012 |
| wildtype | IFR <sub>4</sub>                  | 7.60E-05 | 0.00013 |
| wildtype | IFR <sub>5</sub>                  | 0.00031  | 0.00049 |
| wildtype | IFR <sub>6</sub>                  | 0.0033   | 0.0047  |
| wildtype | IFR <sub>7</sub>                  | 0.018    | 0.023   |
| wildtype | IFR <sub>8</sub>                  | 0.056    | 0.069   |
| B.1.1.7  | Increase in transmission rate     | 0.403    | 0.5227  |
| B.1.1.7  | Immune escape                     | 0        | 0.1     |
| B.1.351  | Increase in transmission rate     | 0.1849   | 0.457   |
| B.1.351  | Immune escape                     | 0.4414   | 0.8281  |
| P.1      | Increase in transmission rate     | 0.3682   | 0.4945  |
| P.1      | Immune escape                     | 0.3588   | 0.6683  |

---

|         |                               |        |        |
|---------|-------------------------------|--------|--------|
| B.1.1.7 | Increase in transmission rate | 0.403  | 0.5227 |
| B.1.1.7 | Immune escape                 | 0      | 0.1    |
| B.1.351 | Increase in transmission rate | 0.1849 | 0.457  |
| B.1.351 | Immune escape                 | 0.4414 | 0.8281 |
| P.1     | Increase in transmission rate | 0.3682 | 0.4945 |
| P.1     | Immune escape                 | 0.3588 | 0.6683 |

---
